# Supplementary material
Source: PubMed Central journal article supplement (PMC4597153)
Supplement: supp_O114.042267_mcp.O114.042267-1.pdf [file supp_O114.042267_mcp.O114.042267-1.pdf]

## Supplementary Figure and Table Legends

**Supplementary Figure 1: Skyline Extracted Ion Chromatograms for each of the CiRT\_SW reference peptides selected by manual curation.** Extracted chromatograms for peak groups representing each of the 14 peptides hand-selected for the CiRT\_SW peptide set are shown as they were detected in SWATH files from human, yeast, and mouse cell lysates. Additional peptides not selected for inclusion in the CiRT\_SW list are also demonstrated at the end of the figure set for comparison.

**Supplementary Figure 2: Comparison of the accuracy in peptide prediction between automated CiRT peptide selection algorithm to the manually curated CiRT\_SW peptides. (A)** The difference between observed and predicted retention time ( $\Delta RT$ ) of each of the confidently identified (FDR < 1%) peak groups defined by an RT-normalized assay library and extracted from a human, yeast, or mouse SWATH-MS run are compared between conditions where the SWATH-MS normalization were performed with manually curated, 14 CiRT peptides (CiRT\_SW) or by automated selection of peptides from the larger 113 CiRT list (CiRT\_ALL) using the `-best_peptides` adaptation to the RTNormalizer algorithm. Data are presented as box and whisker plots, with the middle quartiles surrounding the median for the entire assay library represented by the box, whiskers showing the 95% data range and the upper and lower 2.5%

of all values plotted as individual data points. **(B)** Correlation between the intensity of a given peptide as determined by the CiRT\_SW and CiRT\_ALL normalization set. Each dot represents the summed intensity of all transitions extracted for a given peptide peak group from the same raw file, with the only difference being the method of RT normalization. **(C)** Distribution of matching and mis-matching peptide peak group intensities for the human (left) and yeast (middle) and mouse (right) derived samples. Pie charts depict overall distribution peptides with matching or mismatching intensity values between CiRT\_SW and CiRT\_ALL aligned datasets. Horizontal bars show distribution of peptides among different categories explaining mismatched intensity values.

**Supplementary Table 1:** Descriptions of the 113 peptides contained in the CiRT list.

**Supplementary Table 2:** A breakdown of the CiRT peptides that were detected and used for RT alignment within each of the 12 data files generated from the fractionated peptide set (described in methods).

**Supplementary Table 3.** A breakdown of the CiRT peptides that were detected and use for RT alignment within each of the 11 OFFGEL data files generated from the human lysate fractionated peptide set (described in methods).

**Supplementary Table 4:** An outline of the conceptual steps and specific softwares used in the peptide assay library generation workflow and the openSWATH workflow for quantitative analysis of DIA data. For each step, the substitution needed, if any, for the workflows using CiRT rather than SiRT normalization peptides is provided.

### **Additional Supplementary Files**

**CiRT\_SW.TraML** – a document containing the transitions needed as input to the openSWATH workflow for the OpenSwathRTNormalization function.

**CiRT\_ALL.TraML** – a document containing the transitions needed as input to the openSWATH workflow for the OpenSwathRTNormalization function, recommended usage with the option “`–best_peptides true`”

**CiRT.txt**– the list of peptides and their iRTs formatted to copy and paste after the `–k` option in the `spectrast2spectrast_iRT.py` script.

# AGFAGDDAPR

HUMAN

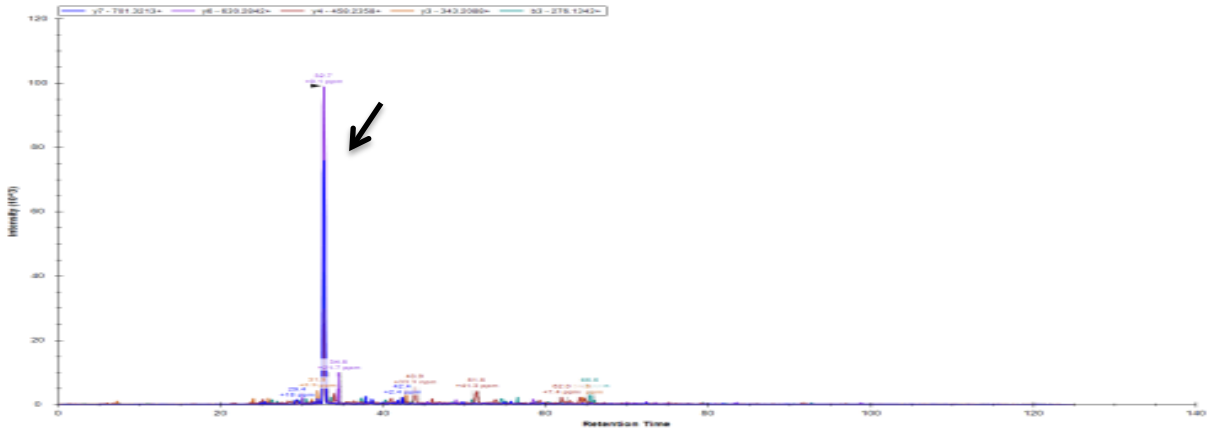

YEAST

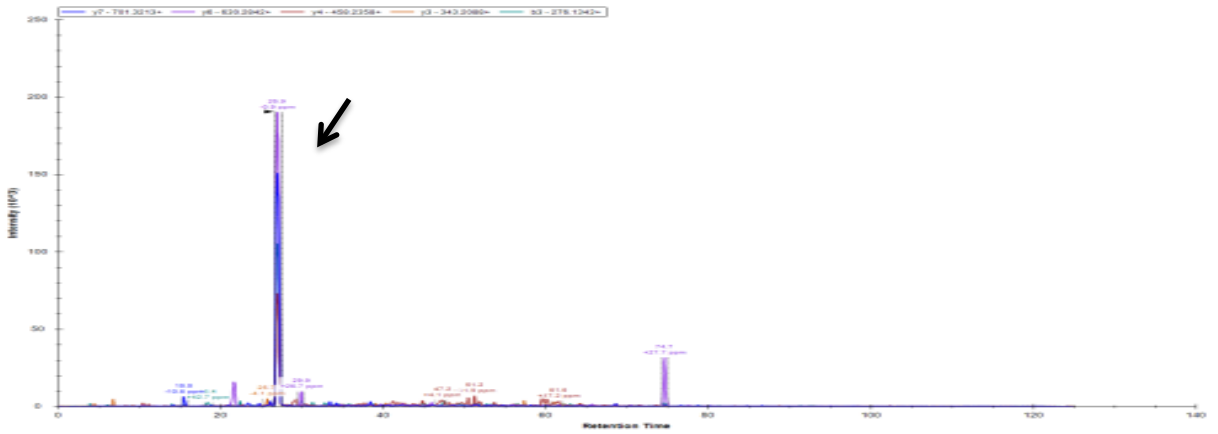

MOUSE

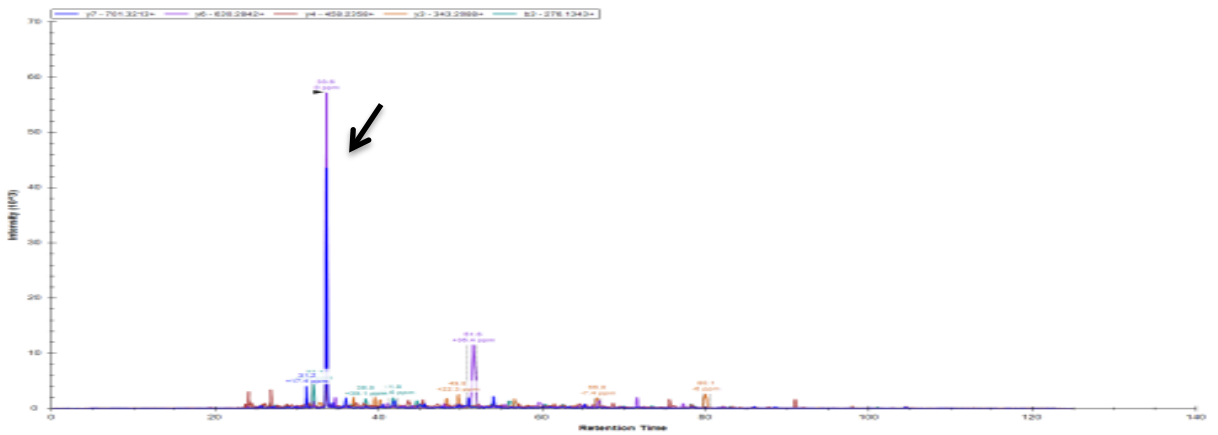

# ATAGDTHLGGEDFDNR

HUMAN

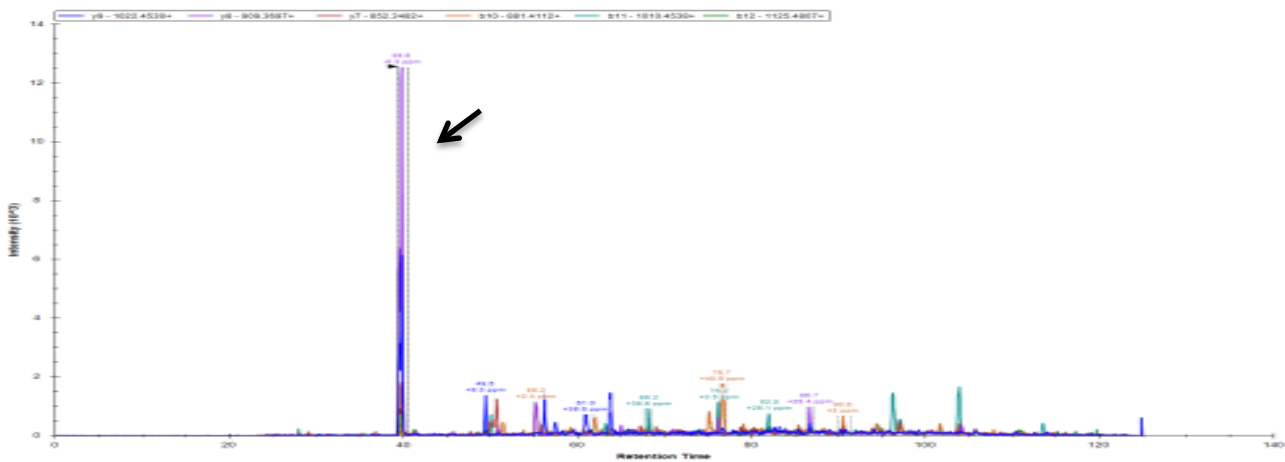

YEAST

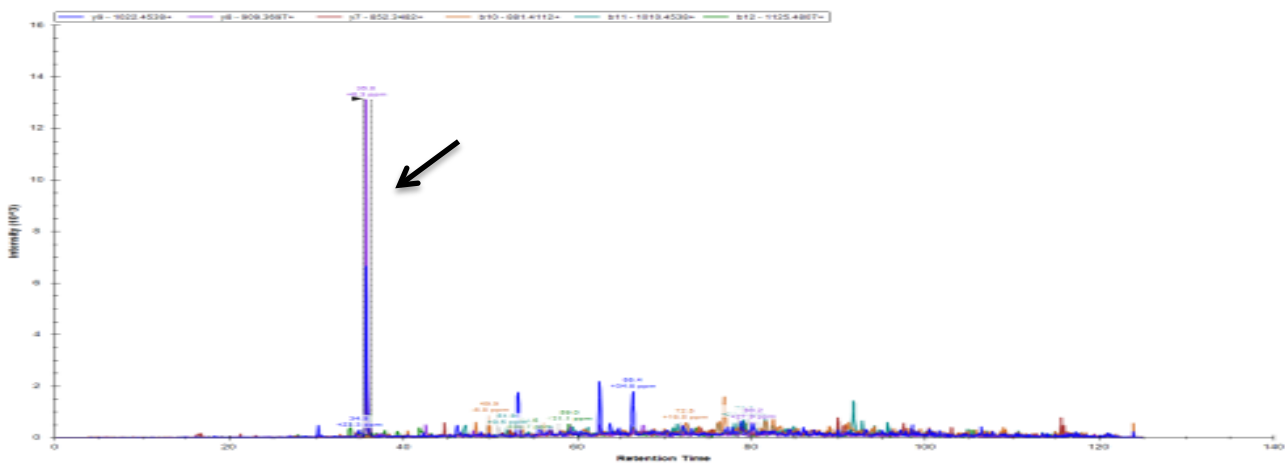

MOUSE

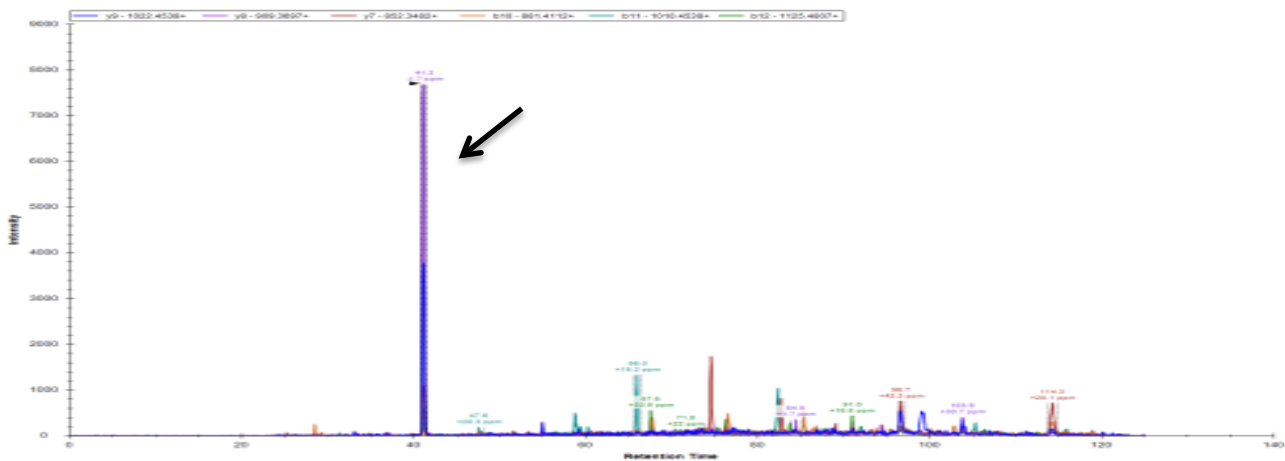

# DLTDYLMK

HUMAN

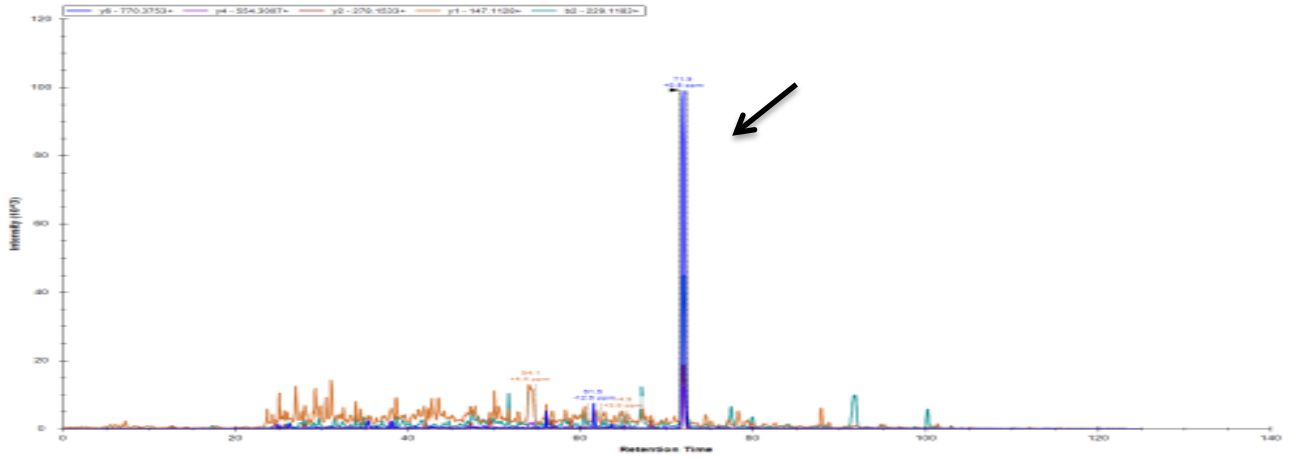

YEAST

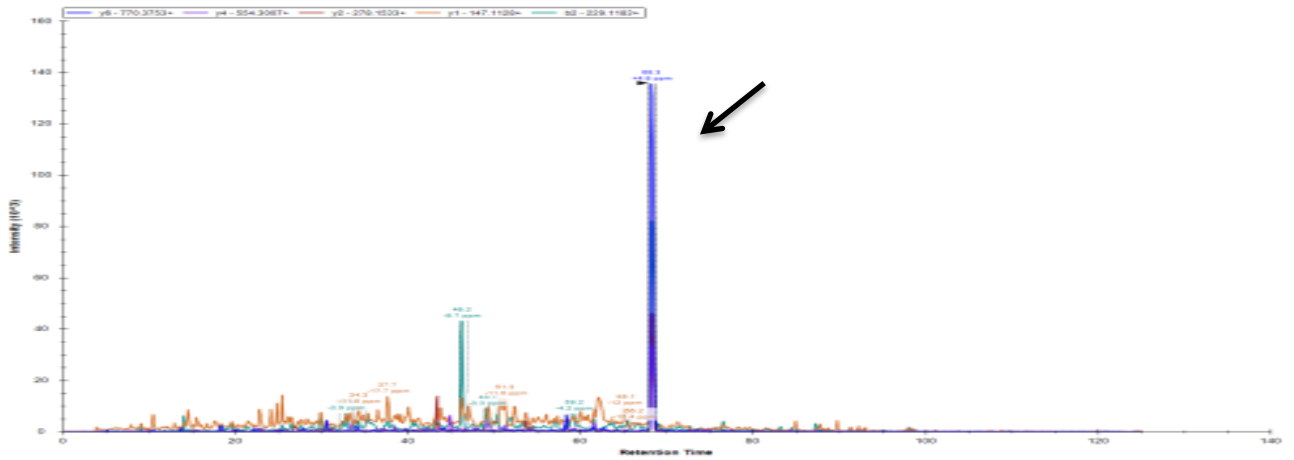

MOUSE

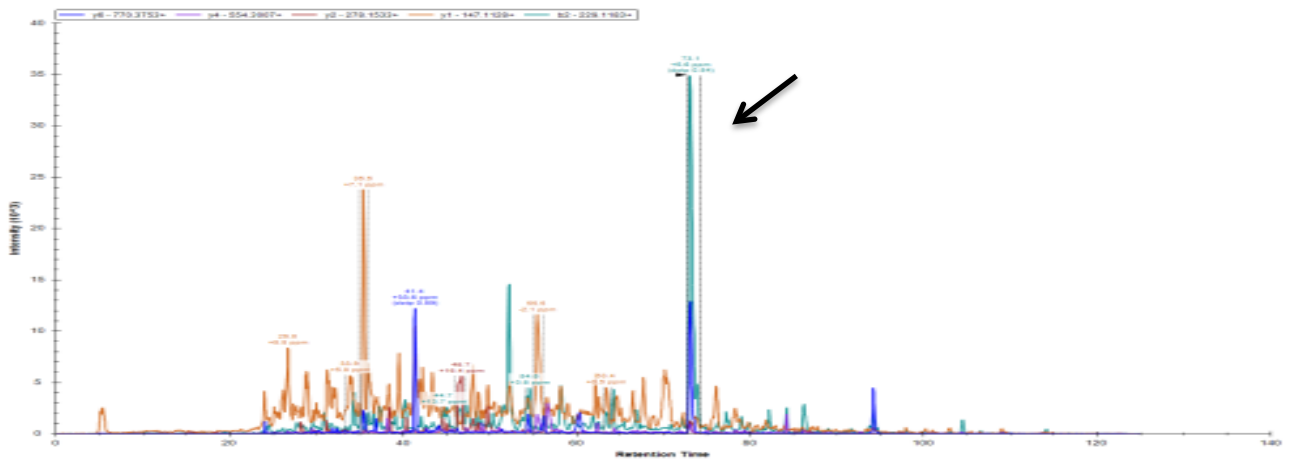

# DSTLIMQLLR

HUMAN

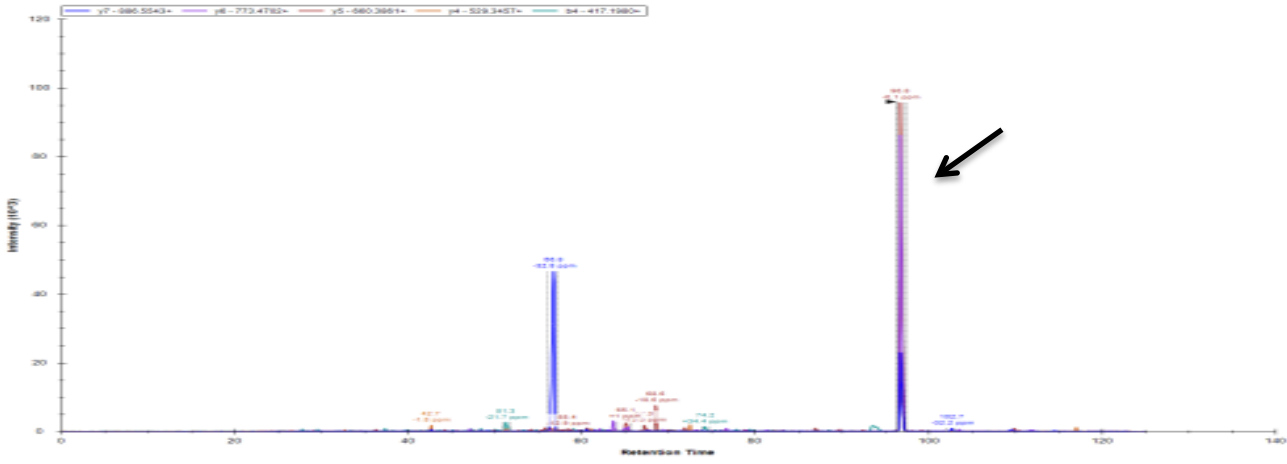

YEAST

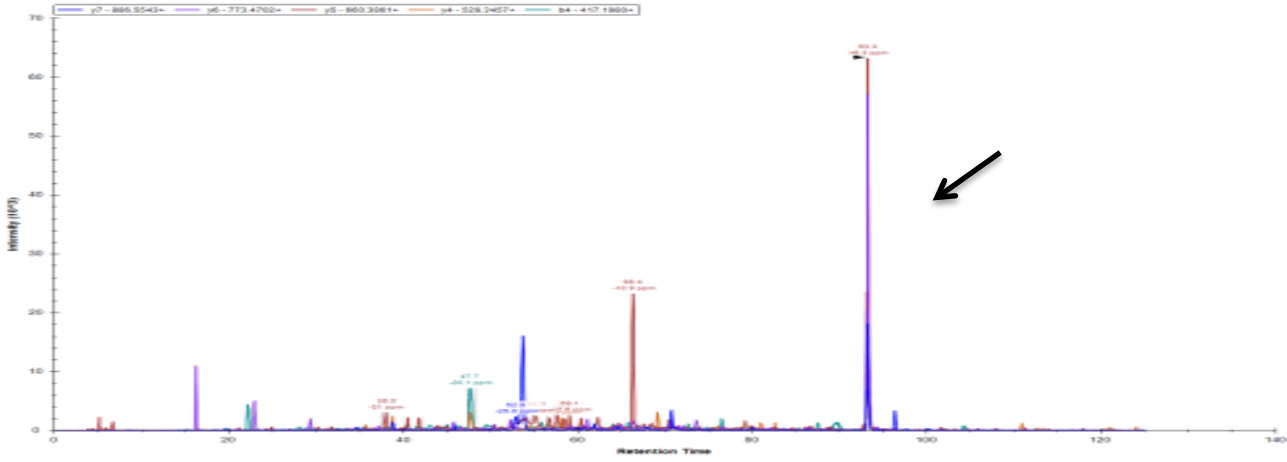

MOUSE

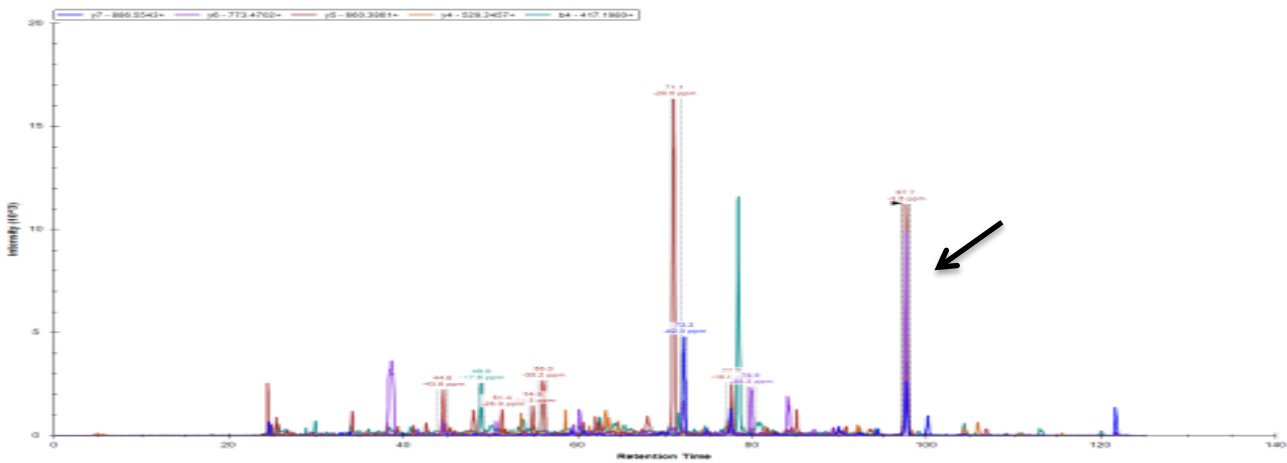

# DSYVGDEAQSK

HUMAN

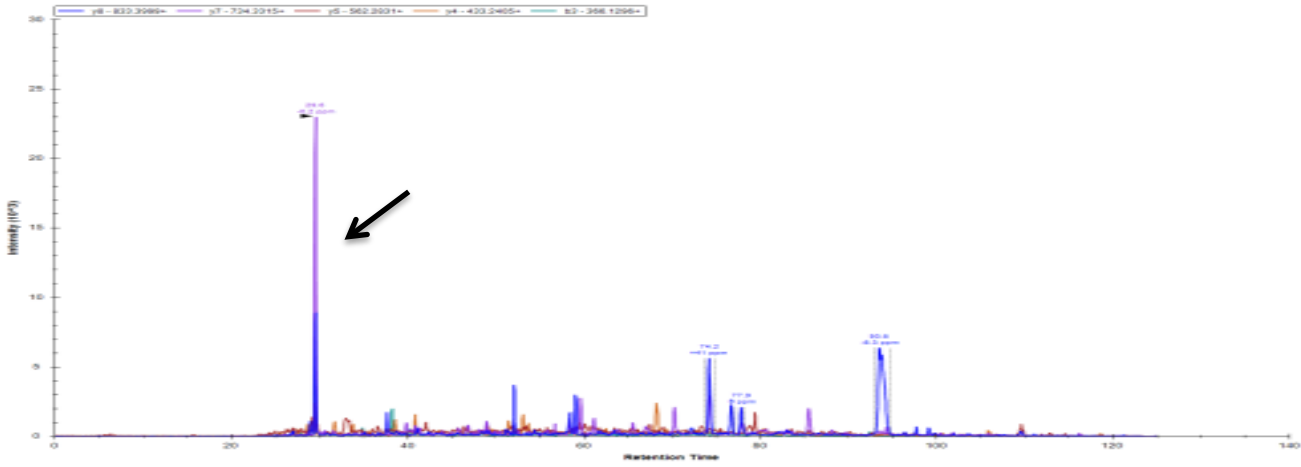

YEAST

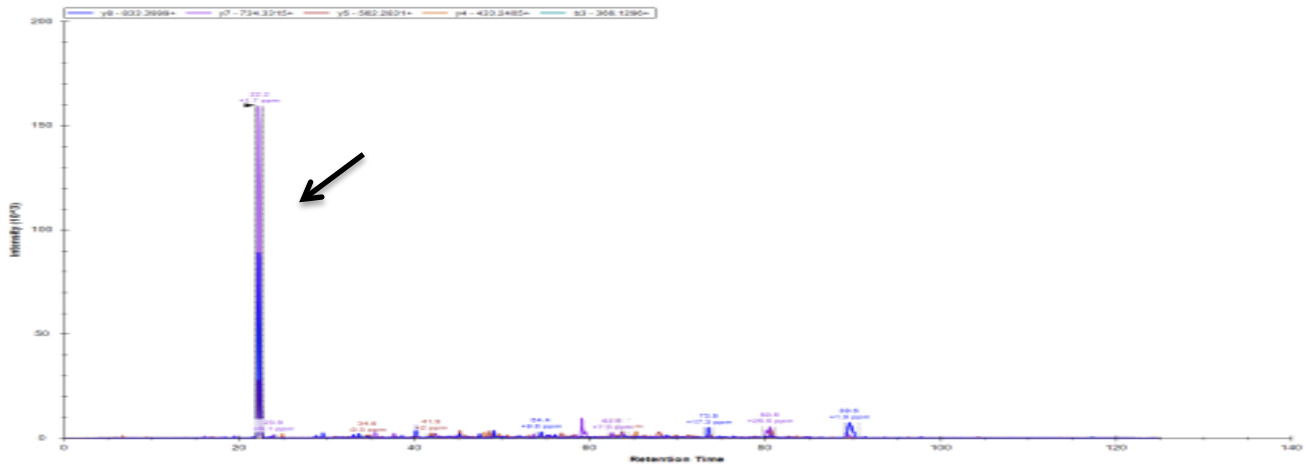

MOUSE

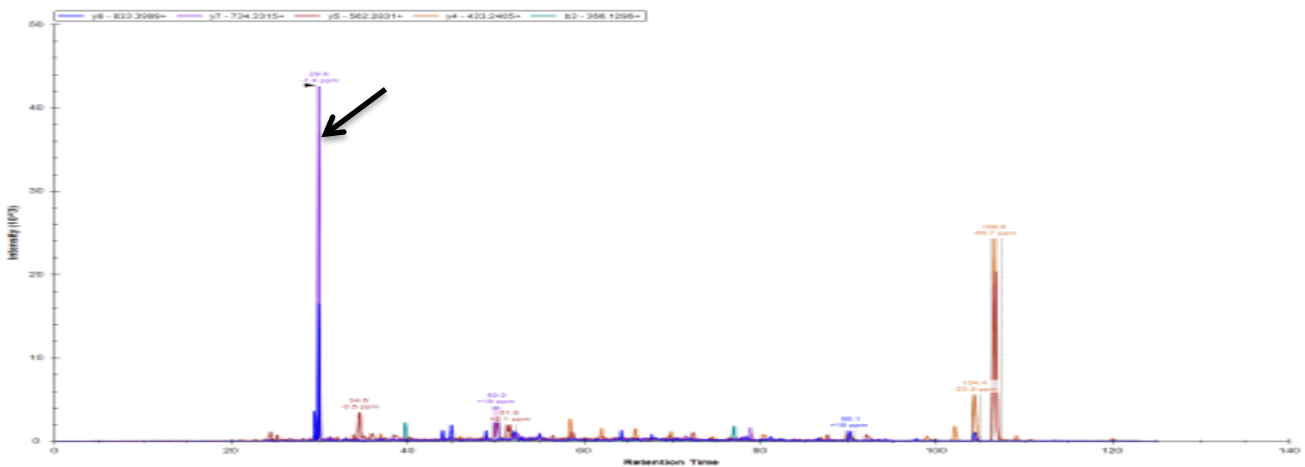



# ELISNASDALDK

HUMAN

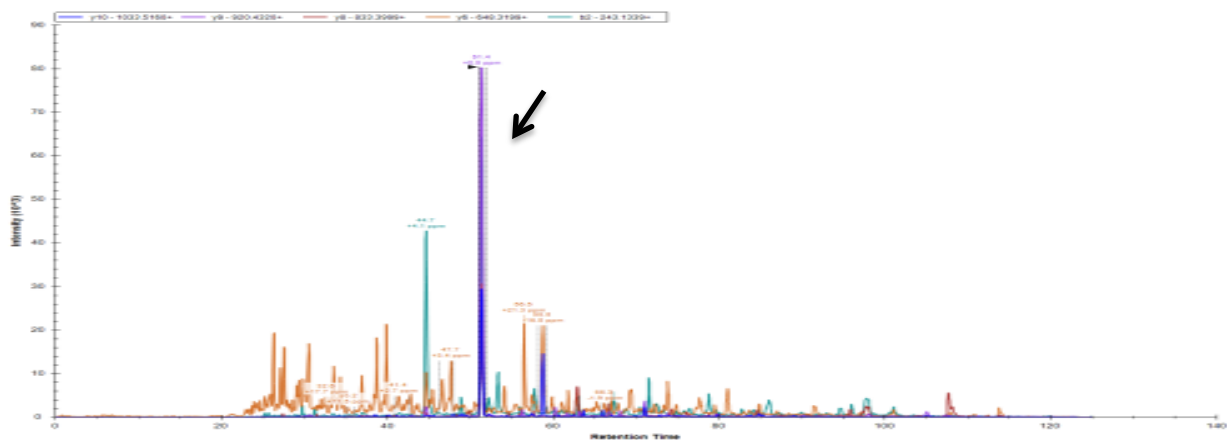

YEAST

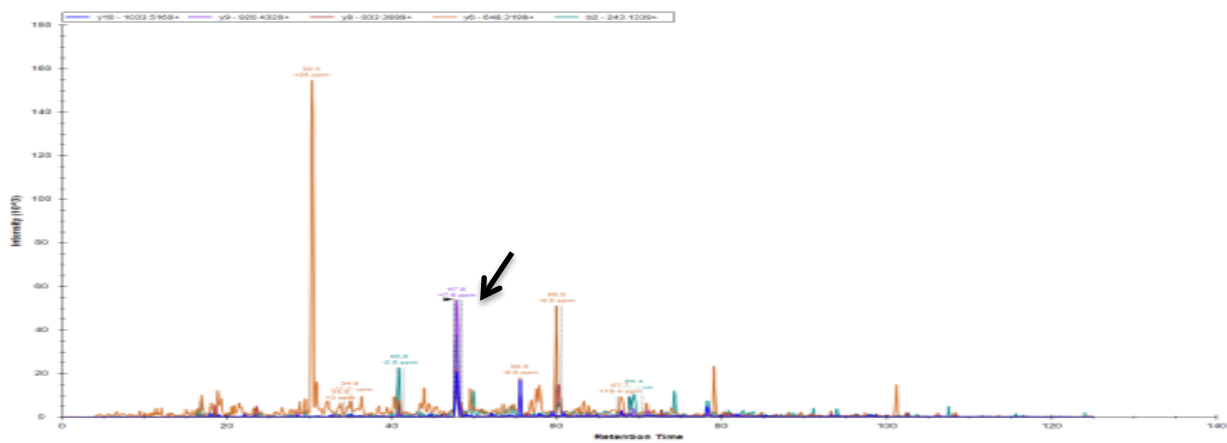

MOUSE

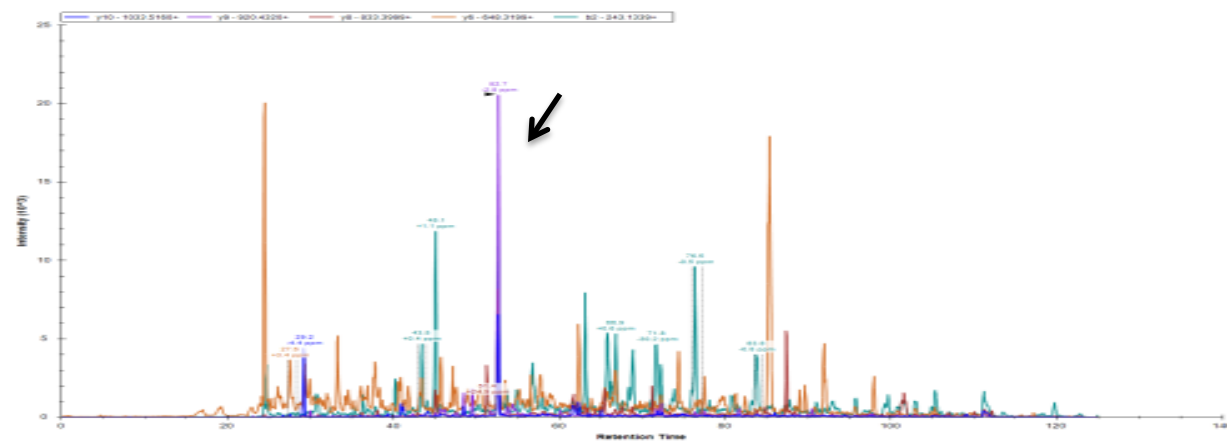

# IGPLGLSPK

HUMAN

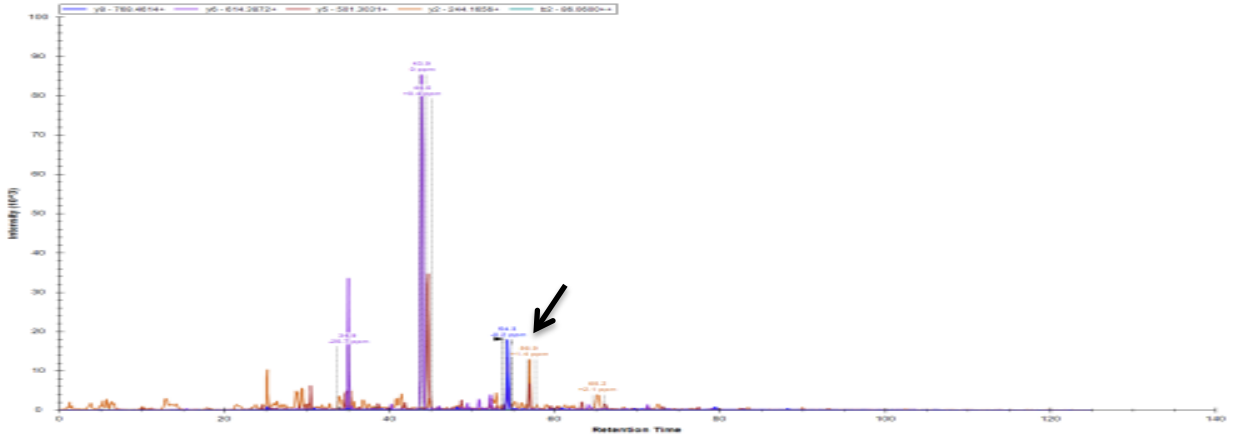

YEAST

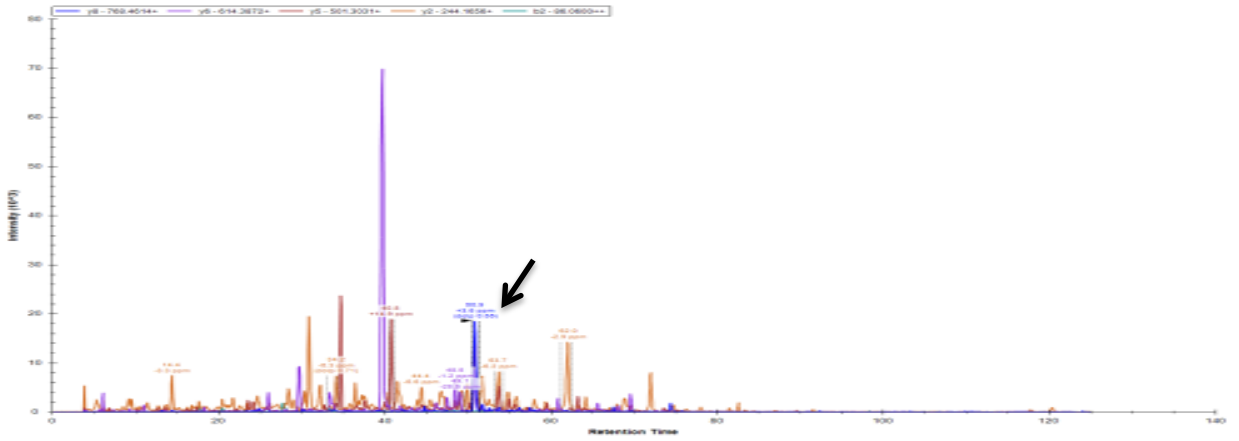

MOUSE

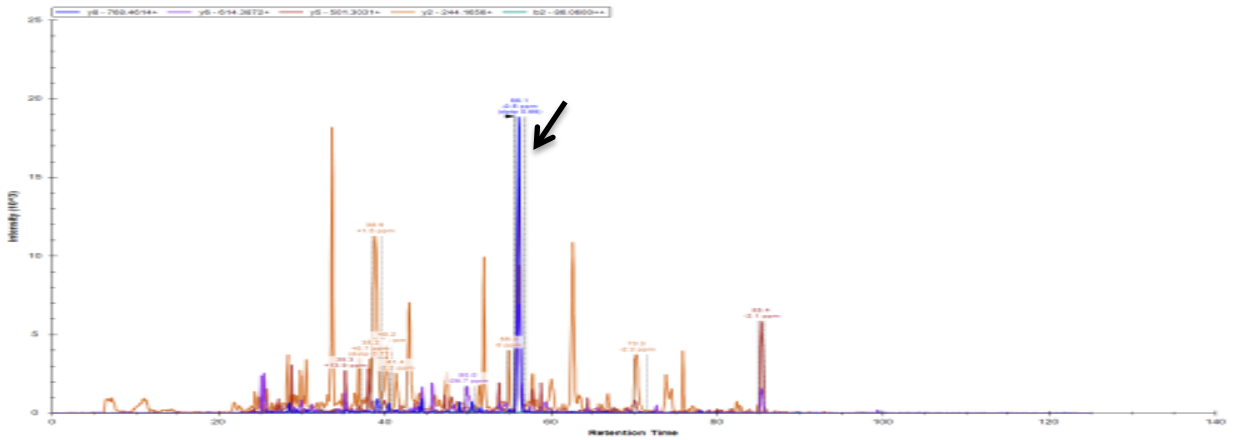

# LGEHNIDVLEGNEQFINAAK

HUMAN

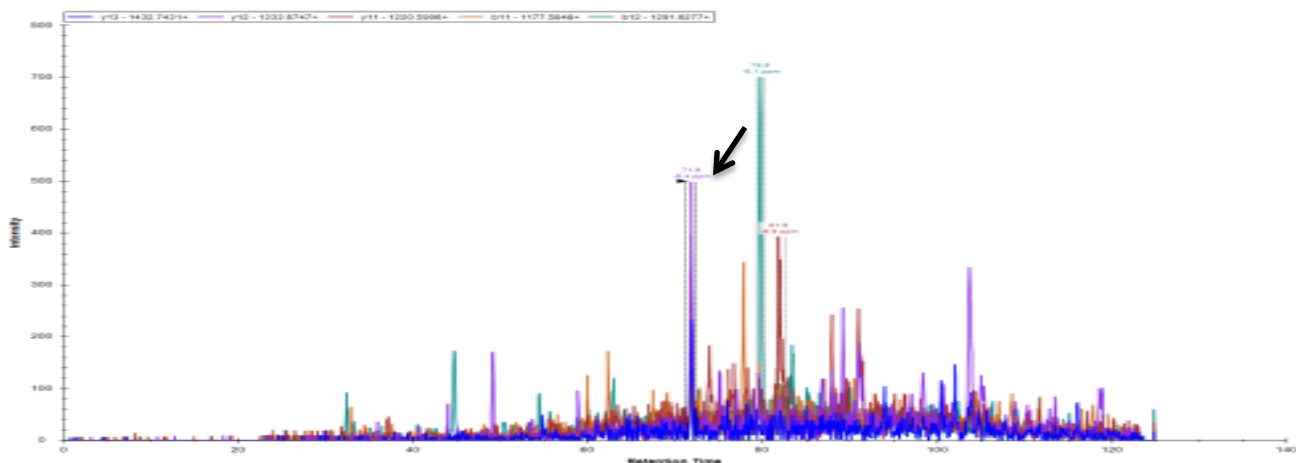

YEAST

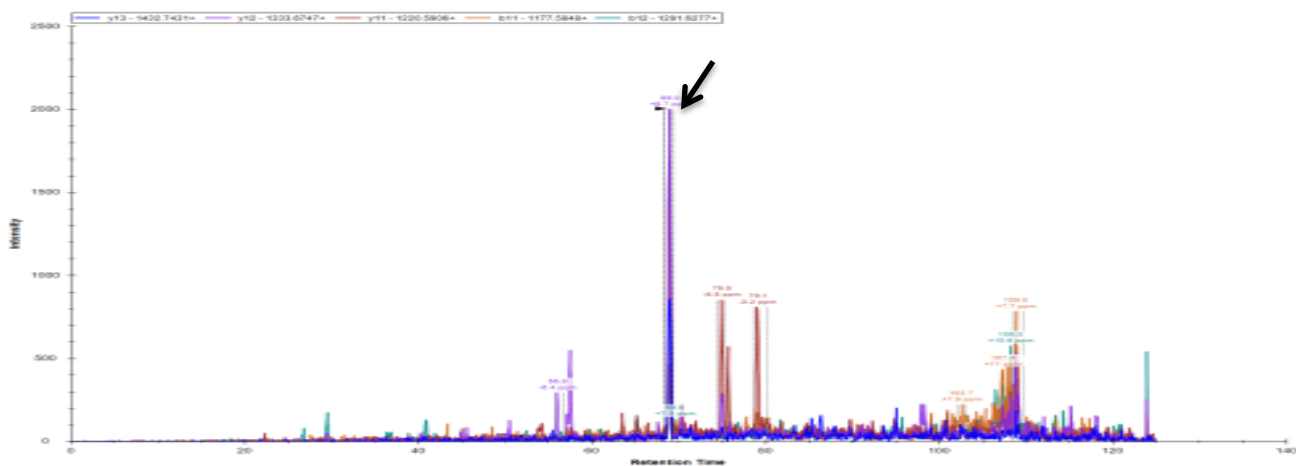

MOUSE

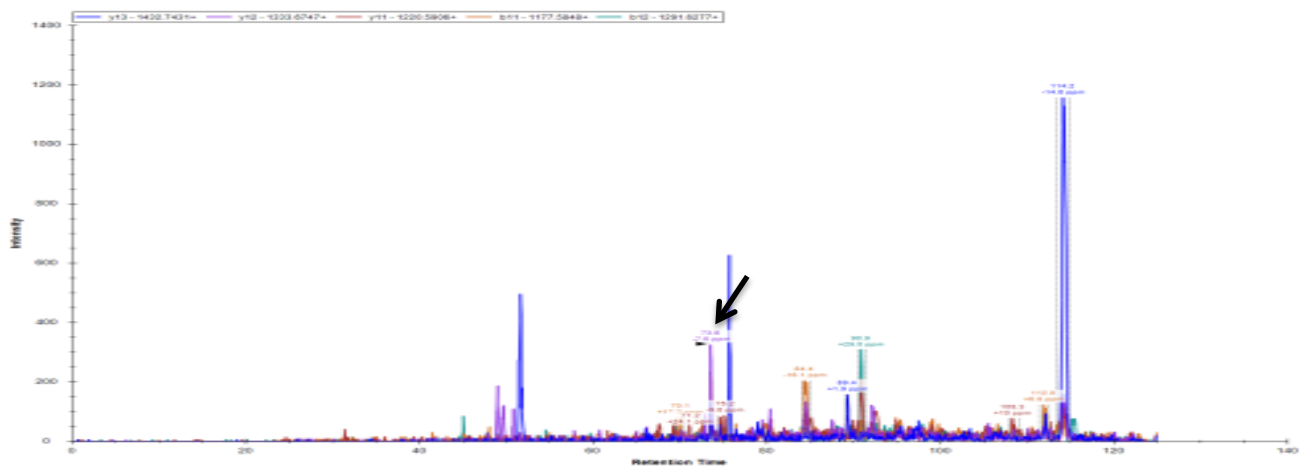

# SNYNFEKPFLWLAR

HUMAN

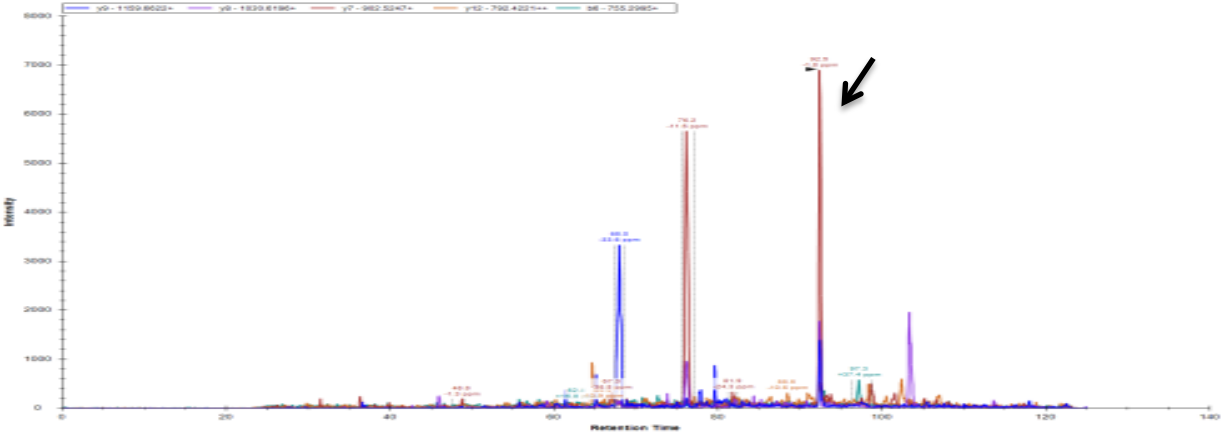

YEAST

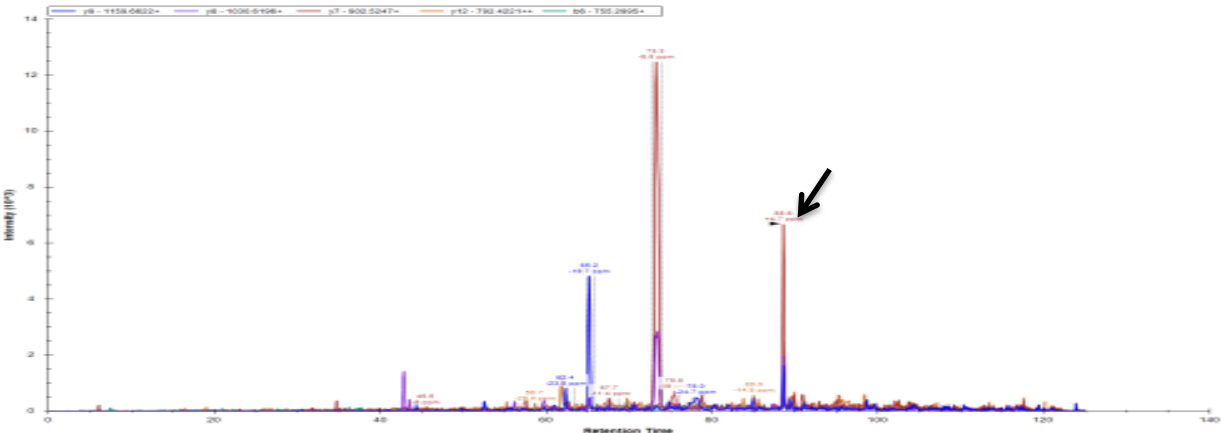

MOUSE

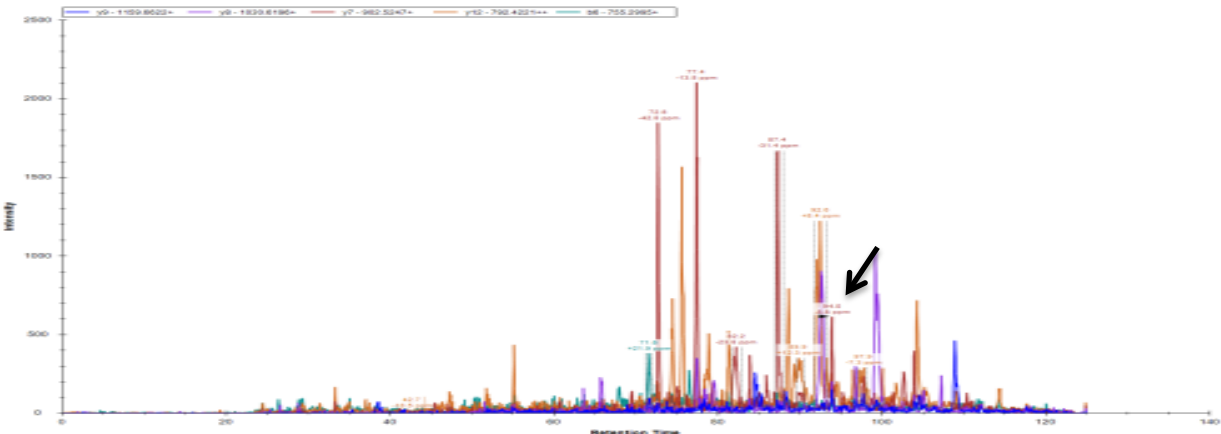

# SYELPDGQVITIGNER

HUMAN

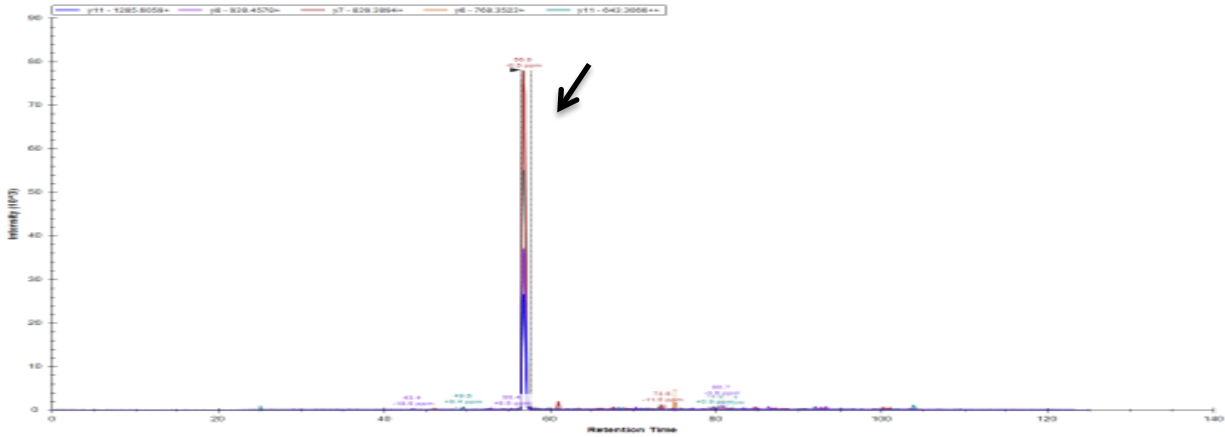

YEAST

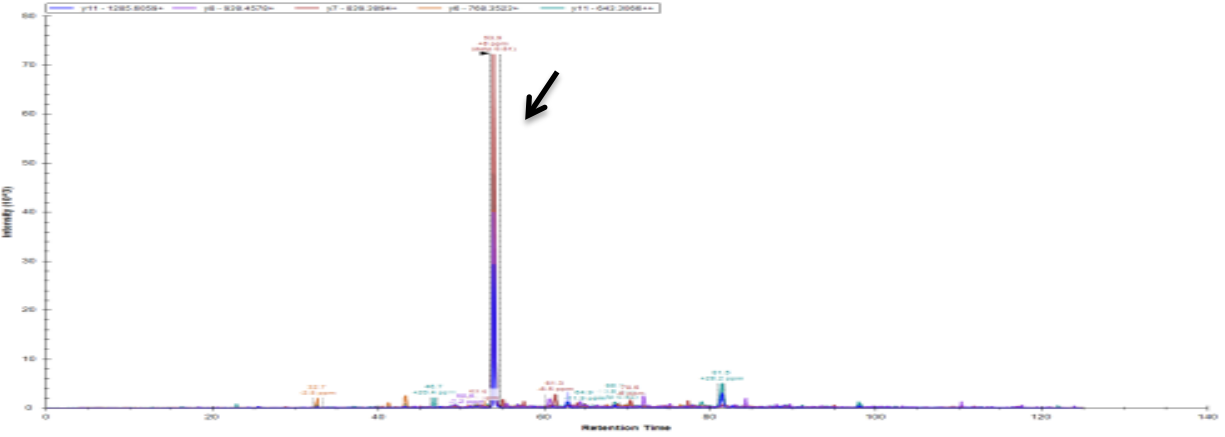

MOUSE

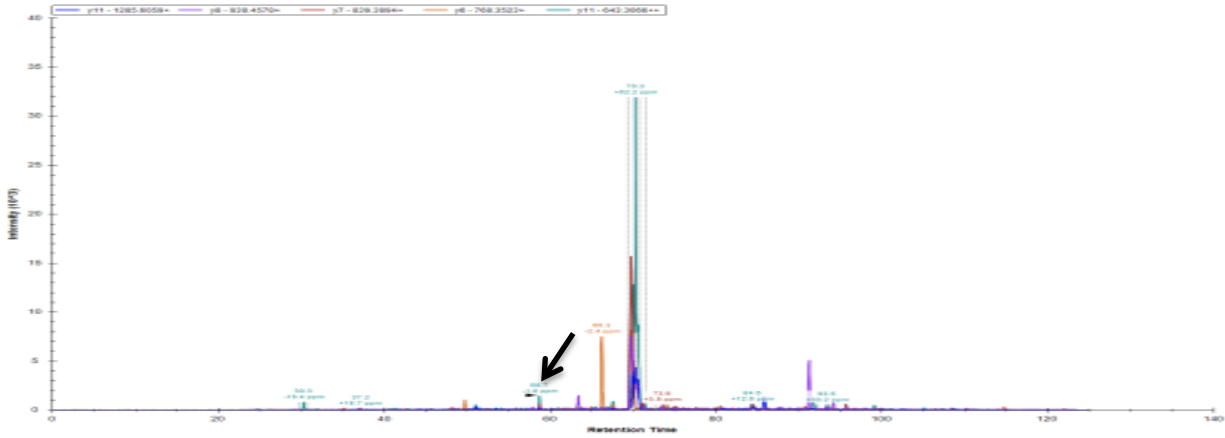

# TTPSYVAFTDTER

HUMAN

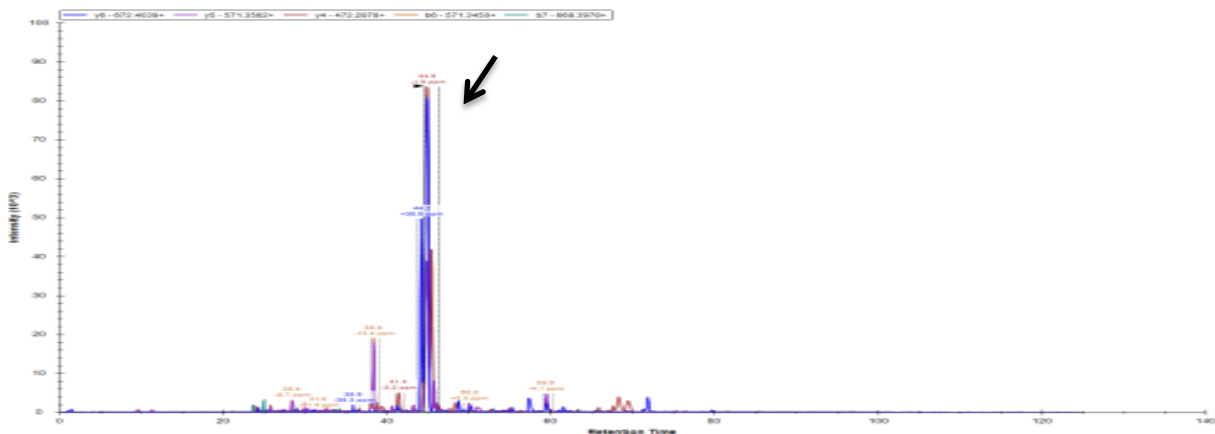

YEAST

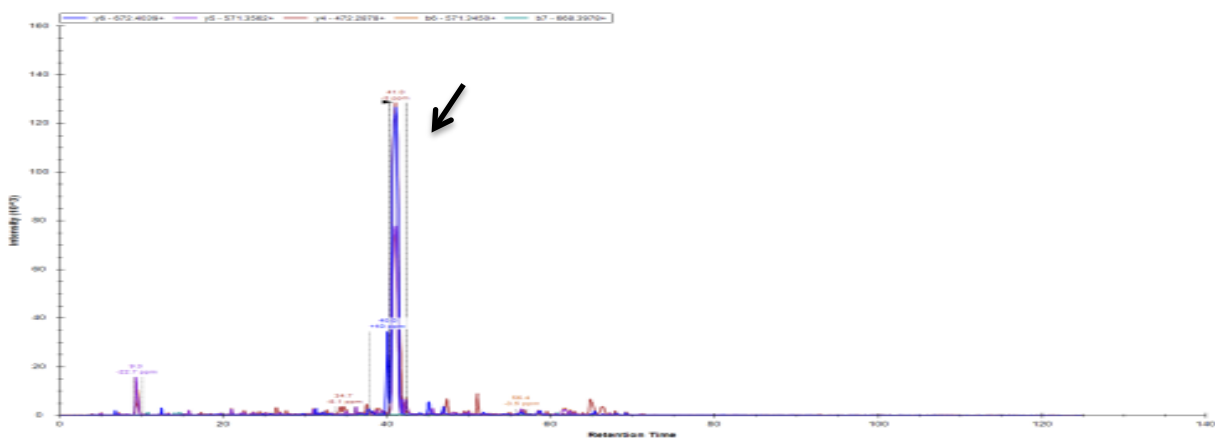

MOUSE

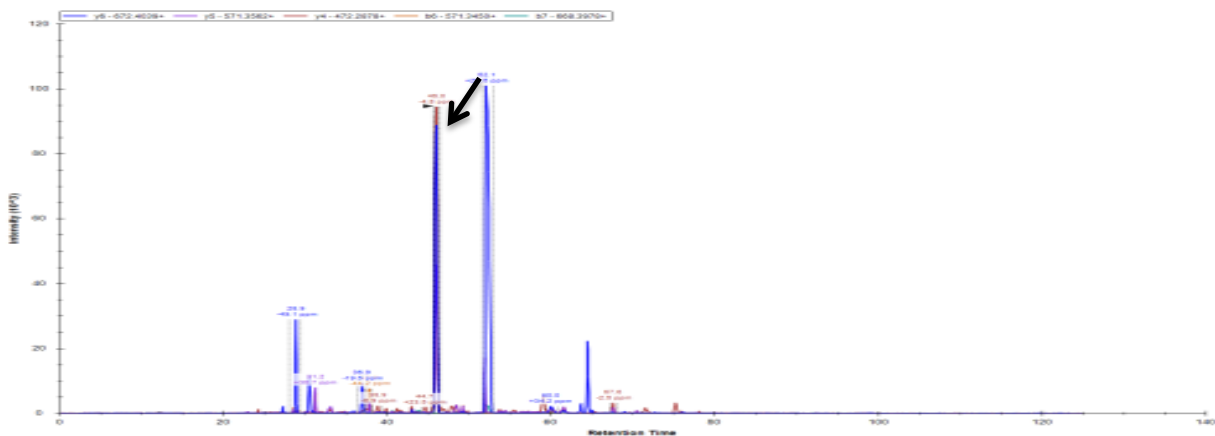

# VATVSLPR

HUMAN

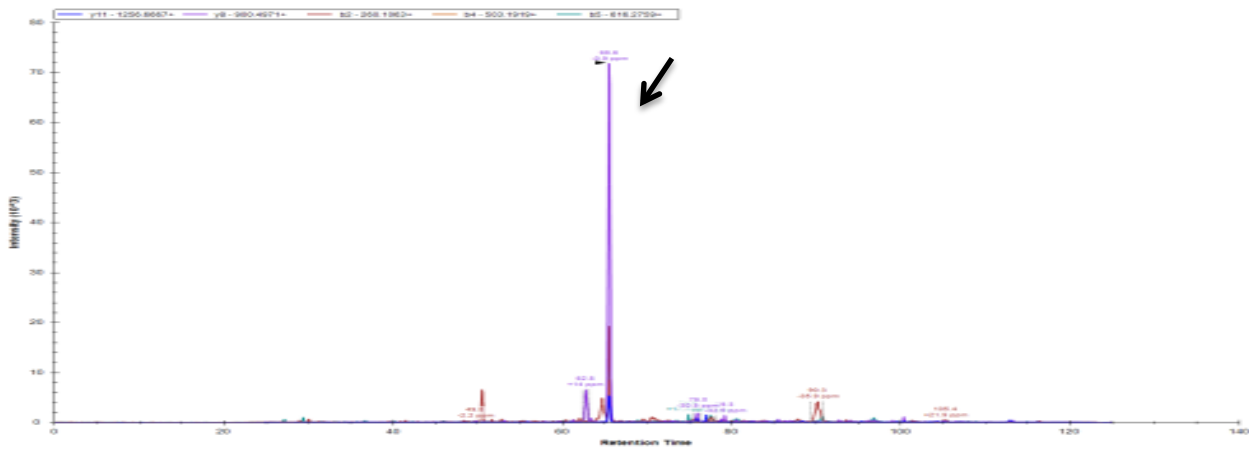

YEAST

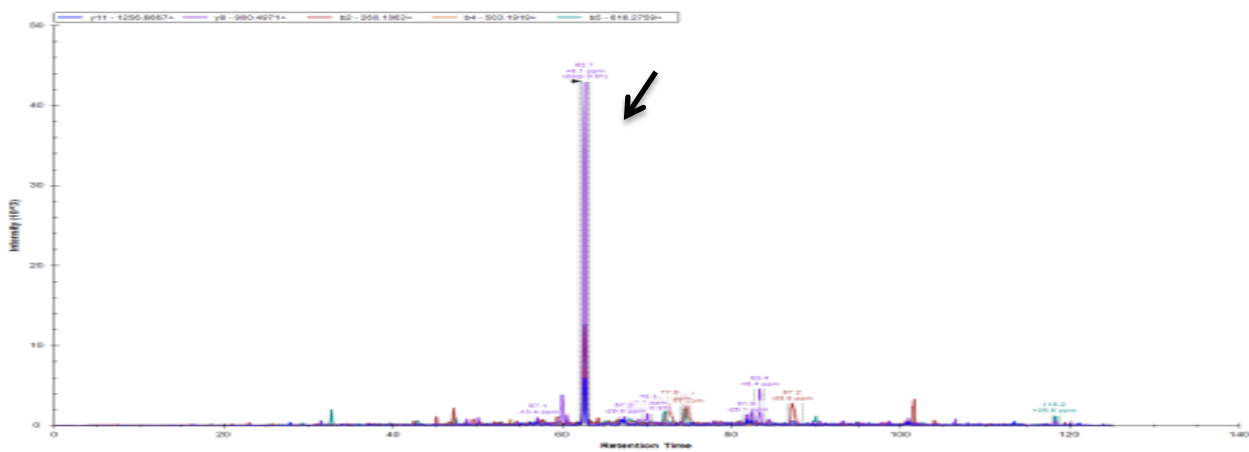

MOUSE

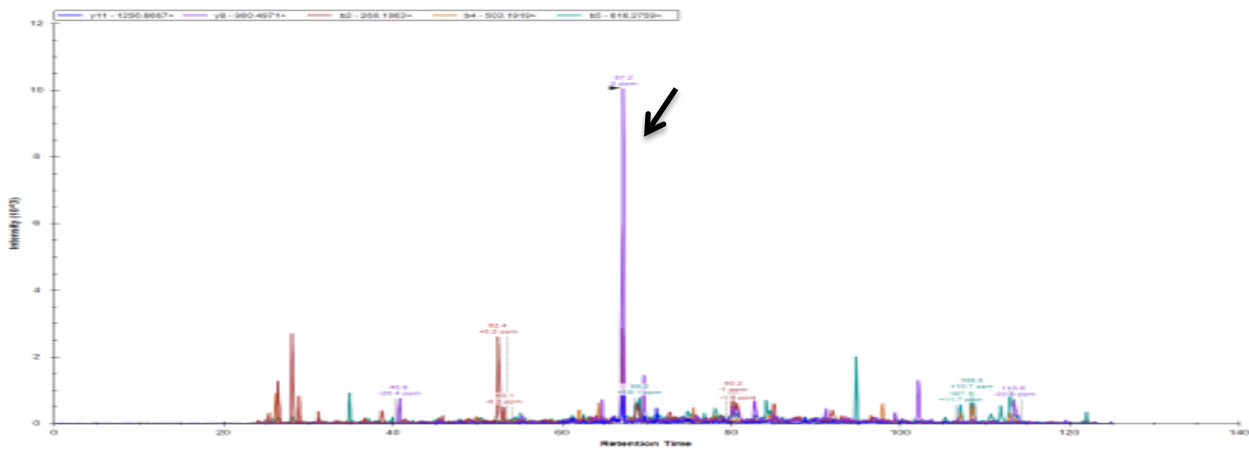

# VCENIPIVLCGNKVDVK

HUMAN

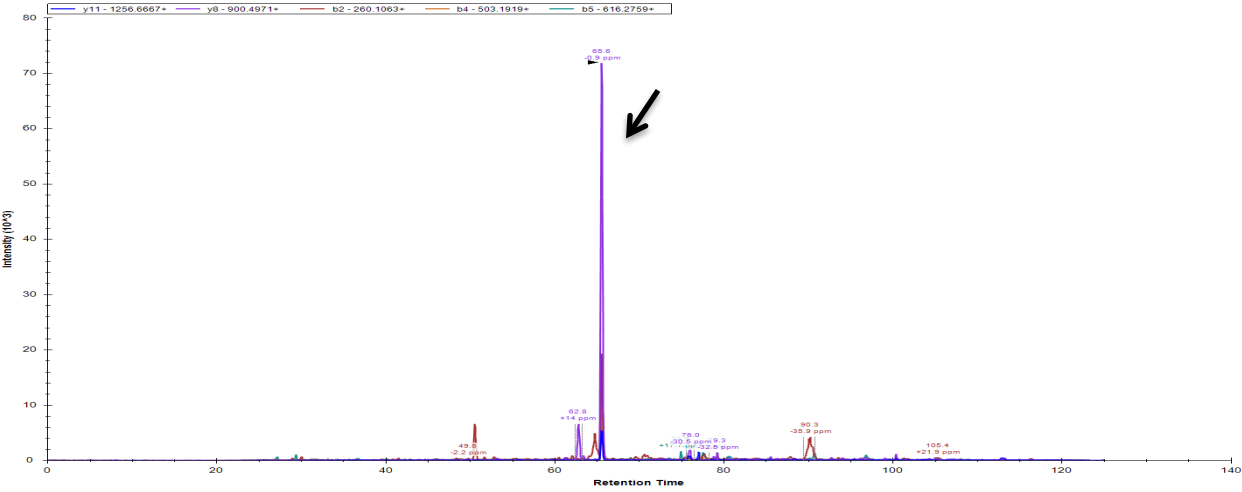

YEAST

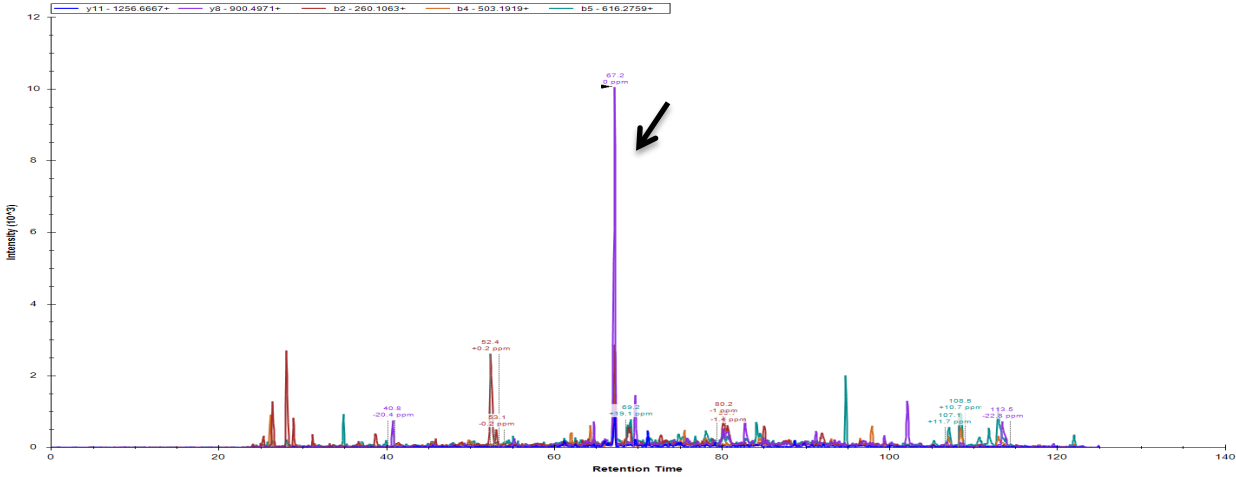

MOUSE

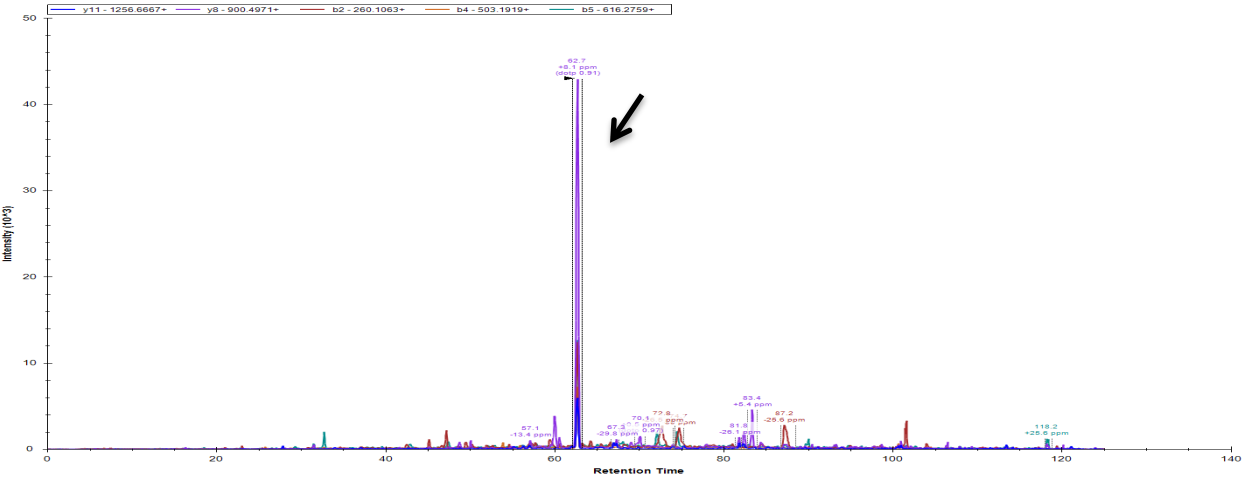



# YFPTQALNFAFK

HUMAN

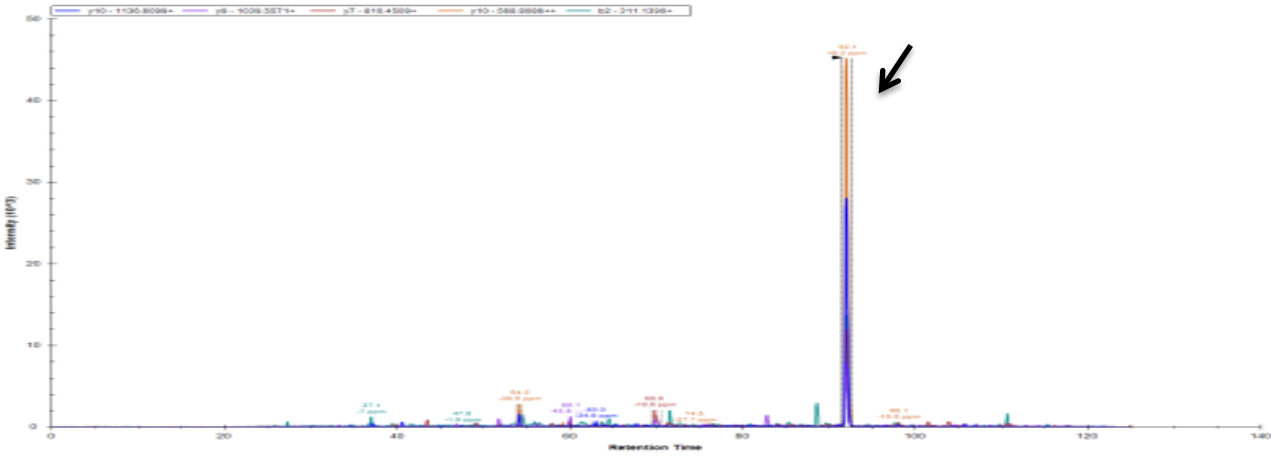

YEAST

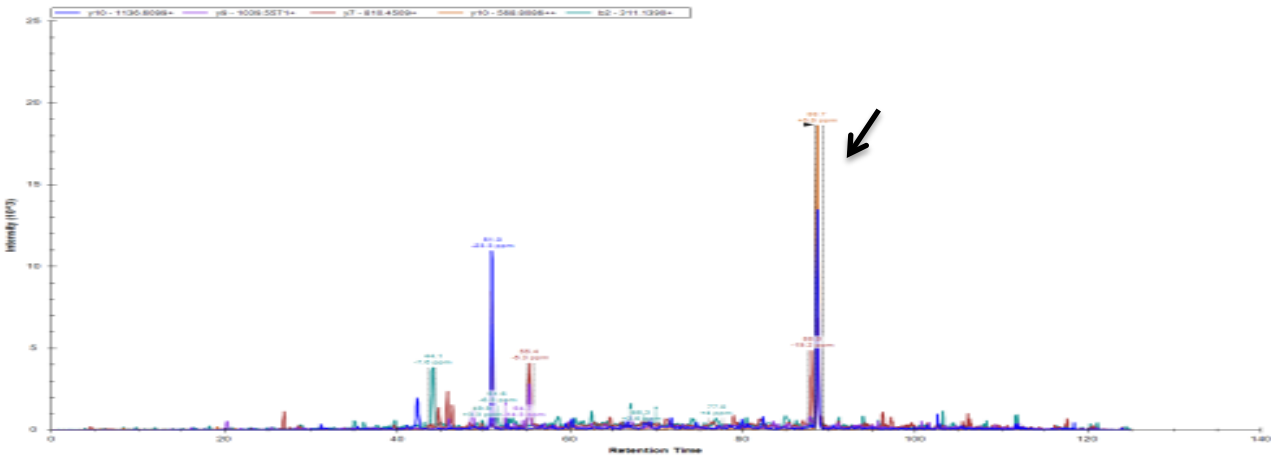

MOUSE

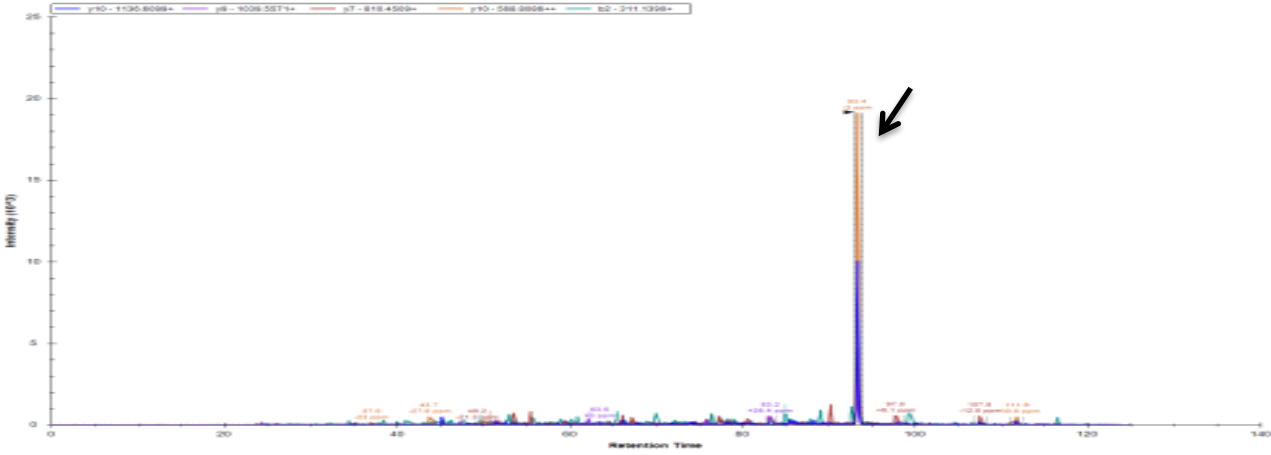

# GVLMYGPPGTGK (NOT USED; HIGH NOISE)

HUMAN

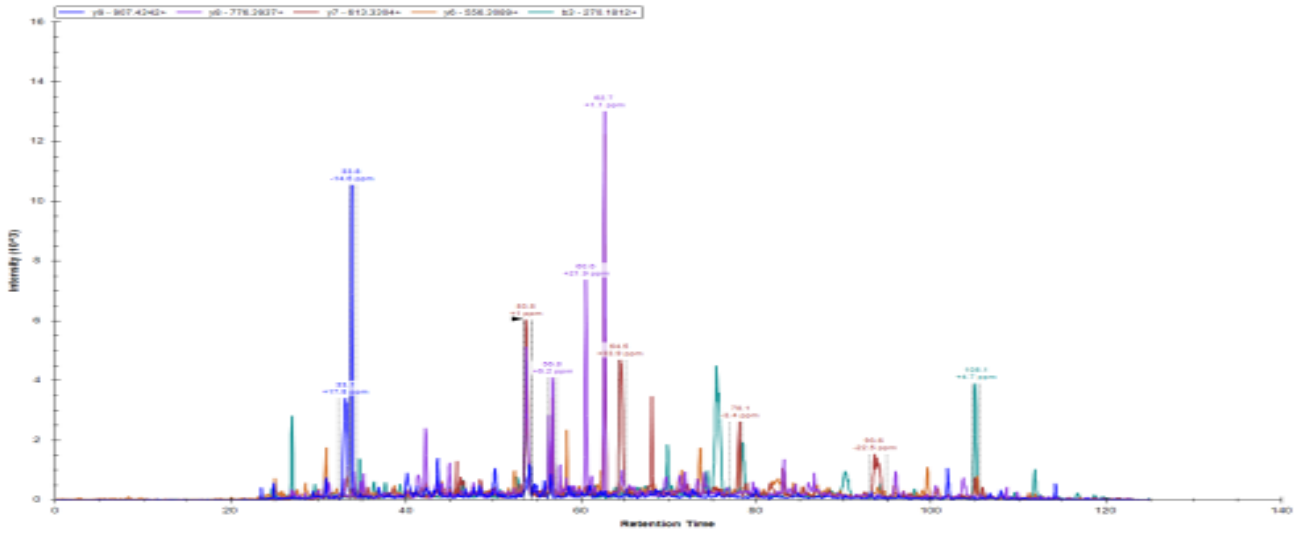

YEAST

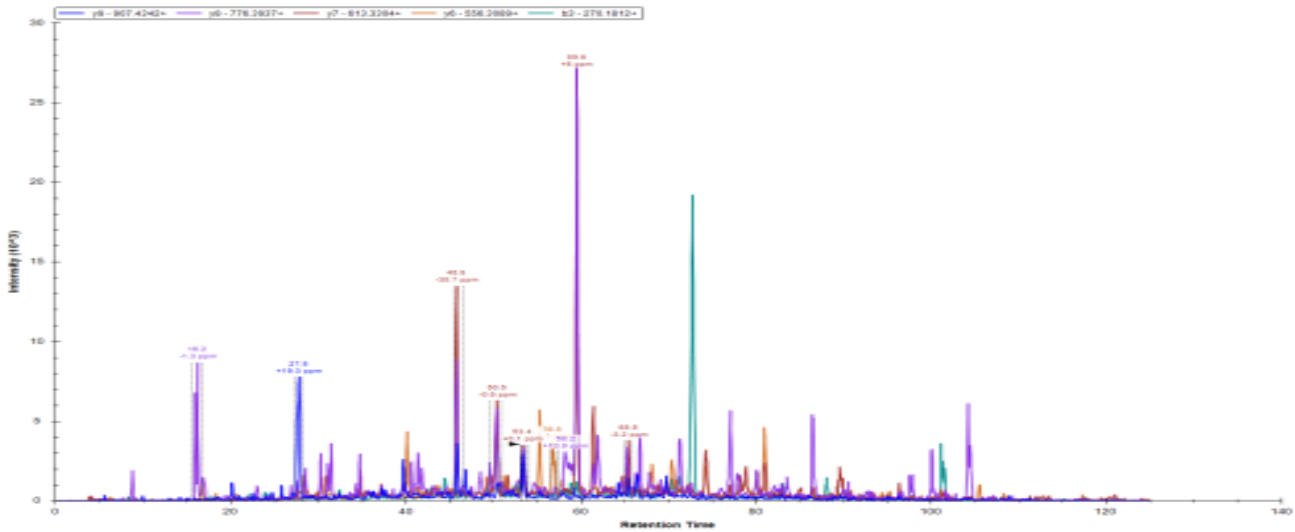

MOUSE

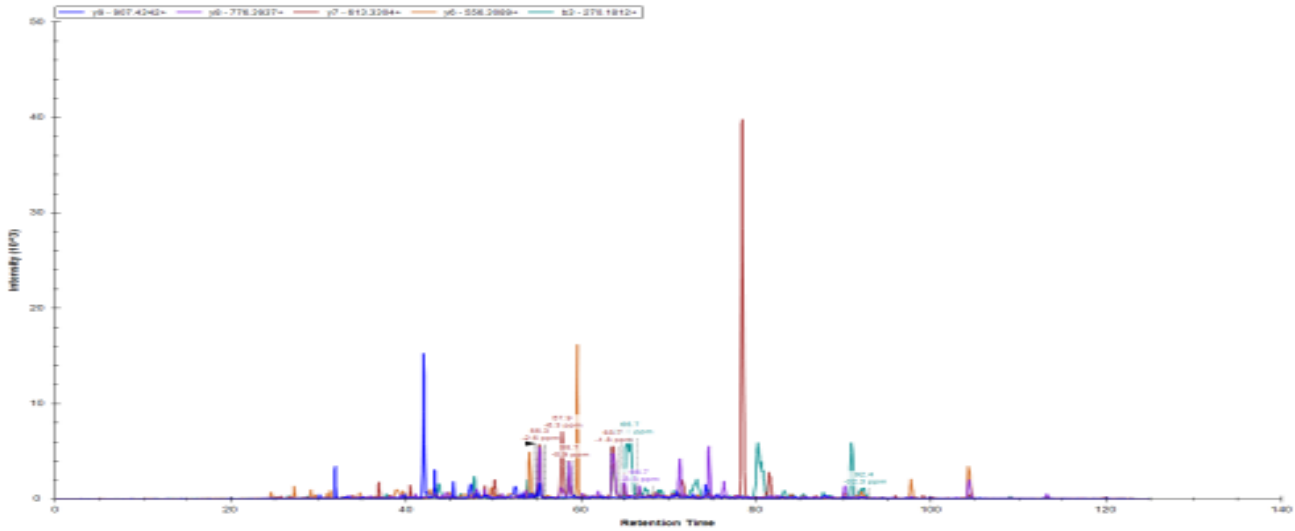

# EAYPGDVFYLSR (NOT USED; LOW SIGNAL:NOISE)

HUMAN

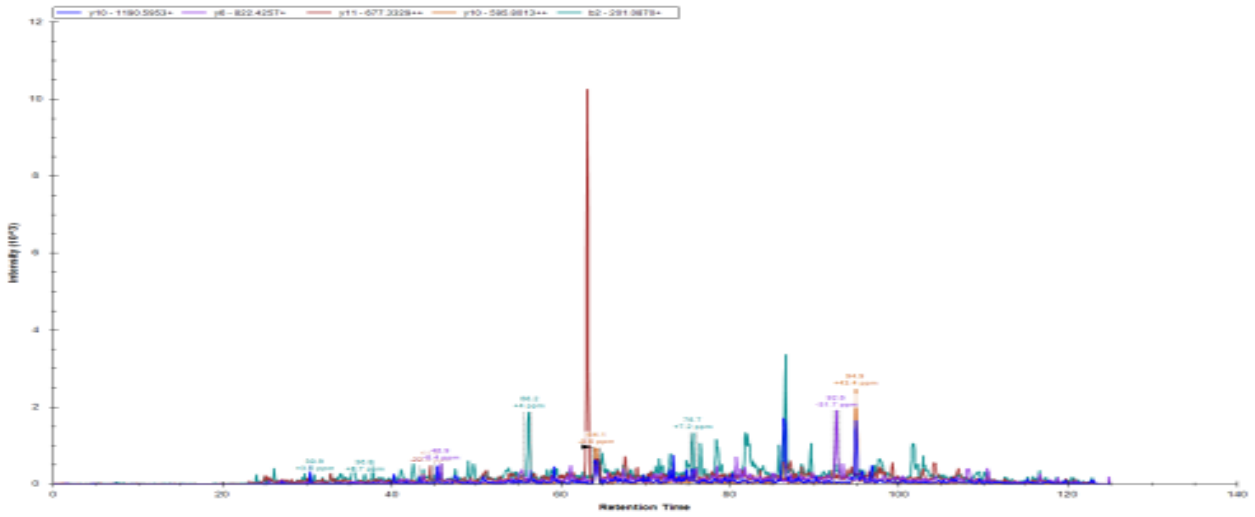

YEAST

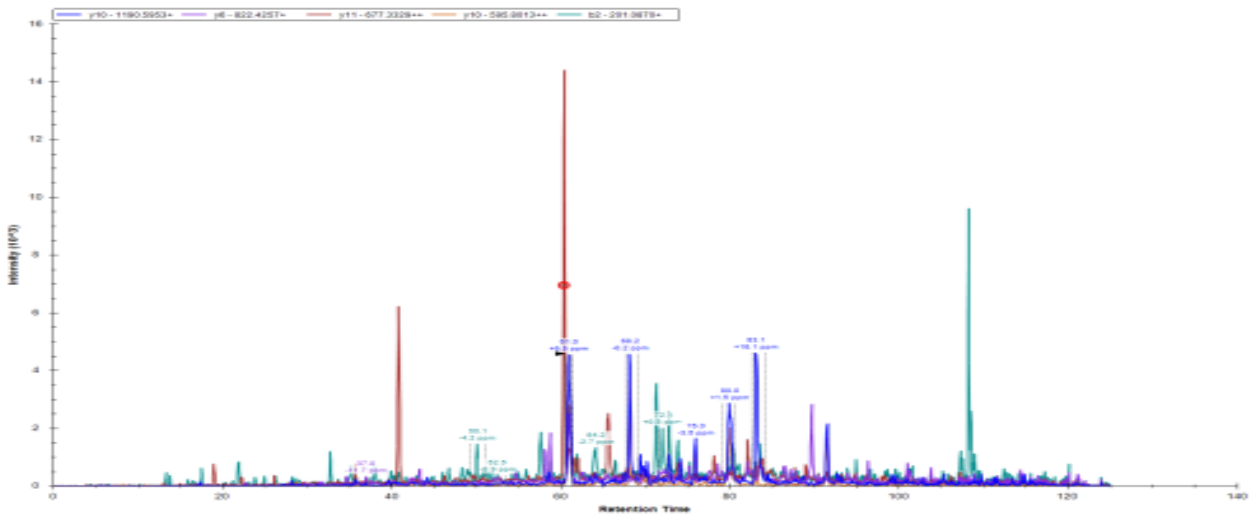

MOUSE

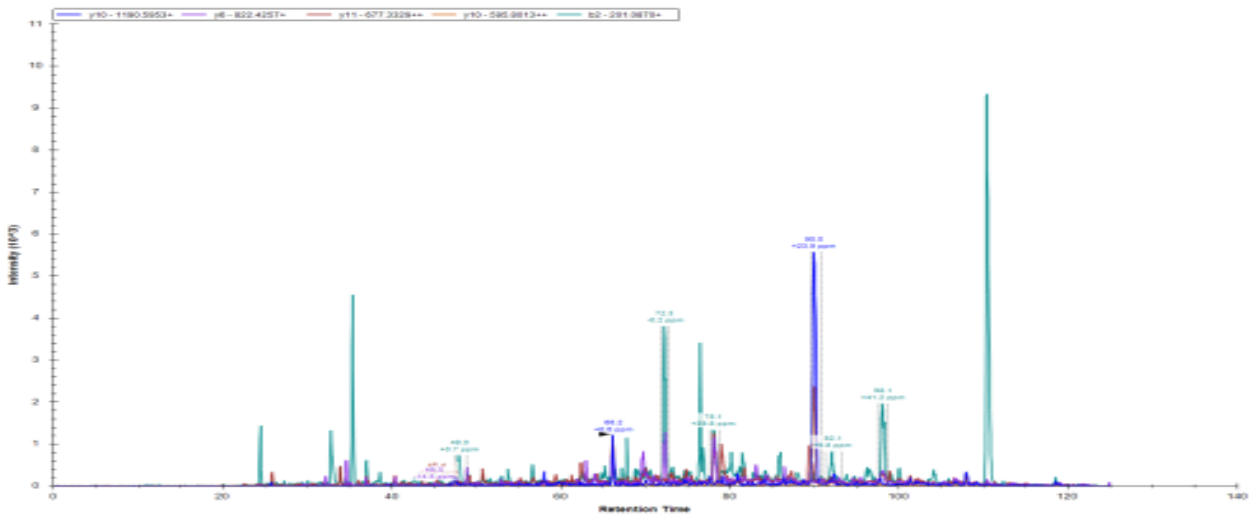

# YPIEHGIVTNWDDMEK (NOT USED; LOW SIGNAL:NOISE)

HUMAN

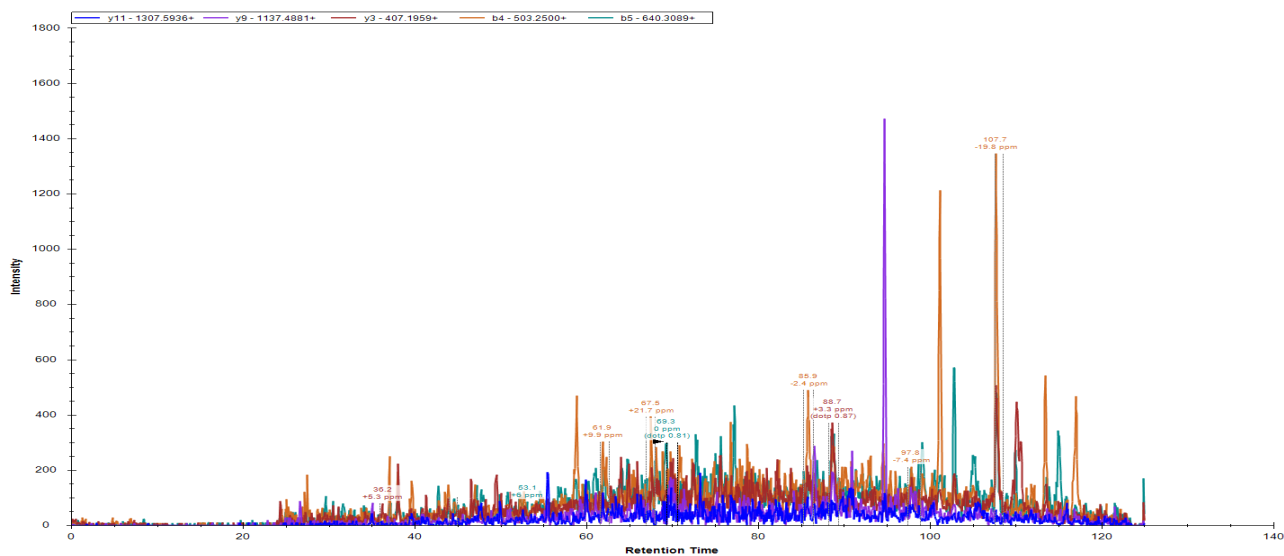

YEAST

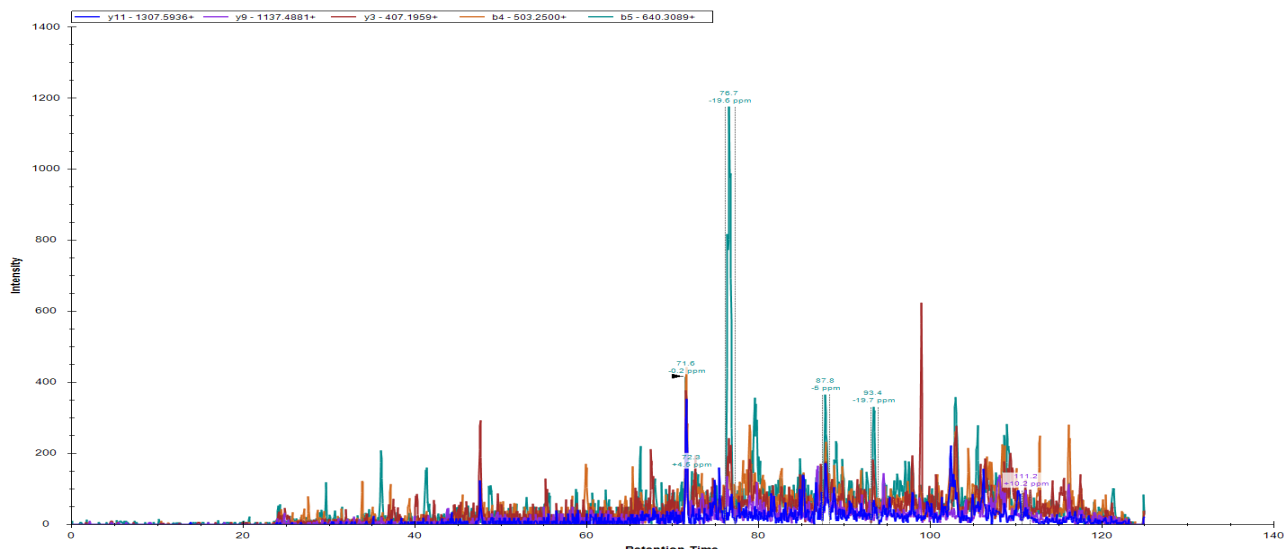

MOUSE

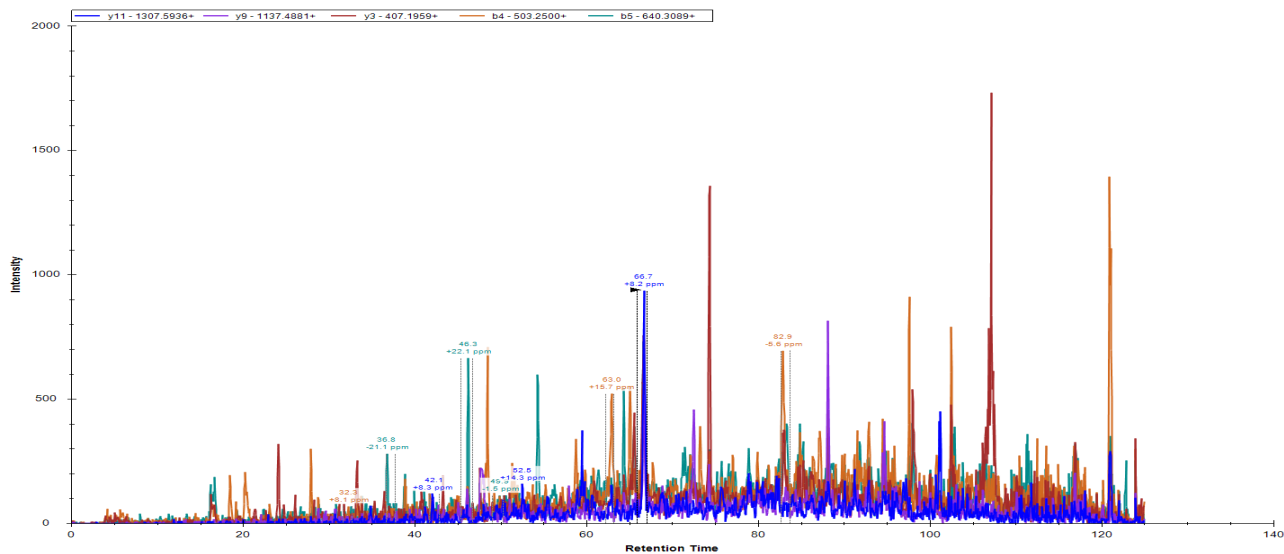

**A**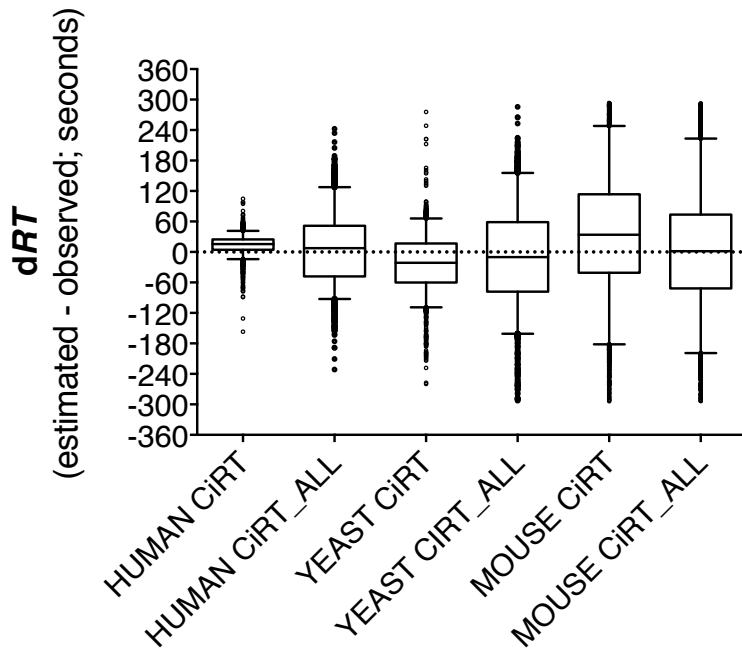**B**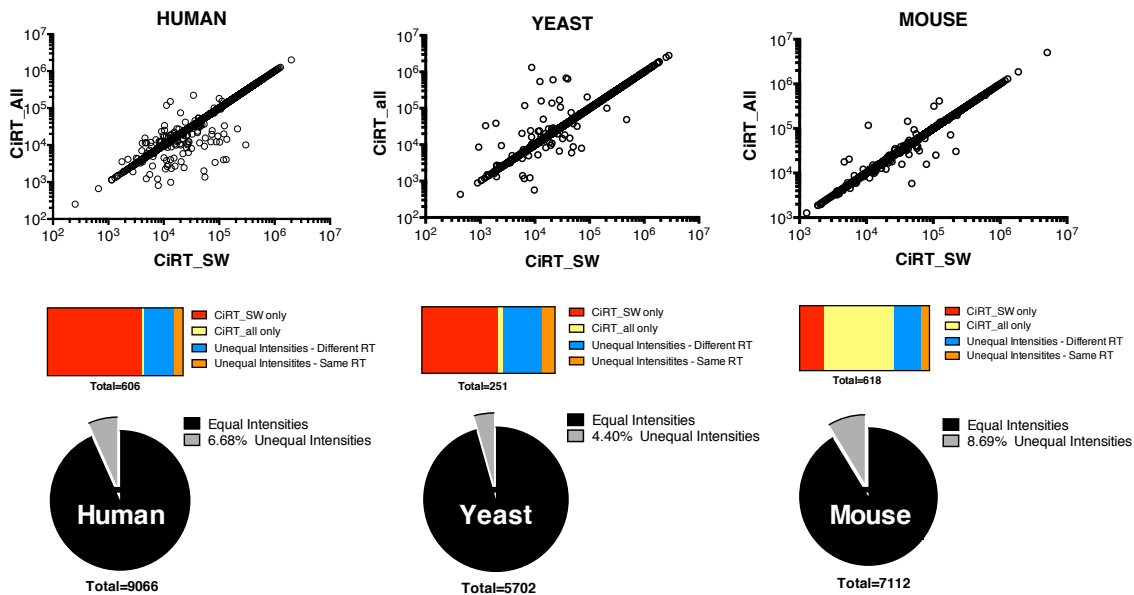

Supplementary Table 1: CiRT Peptide List

| Peptide Sequence | UniProtID* | Gene Name** | iRT Value*** |
|------------------|------------|-------------|--------------|
| ADTLDPALLRPGR    | P33298     | PRS6B       | 36.0         |
| AFEEAEK          | P25694     | CDC48       | -21.4        |
| AFLIEEQK         | P40525     | RL34B       | 22.8         |
| AGFAGDDAPR       | P60010     | ACT         | -9.8         |
| AGLQFPVGR        | Q12692     | H2AZ        | 37.0         |
| AILGSVER         | P04801     | SYTC        | 5.4          |
| APGFGDNR         | P19882     | HSP60       | -15.6        |
| AQIWDTAGQER      | P51996     | YPT32       | 16.9         |
| ATAGDTHLGGEDFDNR | P09435     | HSP73       | 3.2          |
| ATIGADFLTK       | P32939     | YPT7        | 43.8         |
| AVANQTSATFLR     | P40327     | PRS4        | 19.2         |
| AVFPSIVGRPR      | P60010     | ACT         | 34.0         |
| CATITPDEAR       | P53982     | IDHH        | -10.1        |
| DAGTIAGLNVLRL    | P22202     | HSP74       | 59.0         |
| DAHQSLLATR       | P32327     | PYC2        | -3.3         |
| DELTLEGIK        | P10081     | IF4A        | 39.1         |
| DLMACAQQTGSGK    | P06634     | DED1        | 0.3          |
| DLTDYLMK         | P60010     | ACT         | 60.0         |
| DNIQGITKPAIR     | P02309     | H4          | 12.6         |
| DNTGYDLK         | P39976     | DLD3        | -9.4         |
| DSTLIMQLLR       | P34730     | BMH2        | 103.7        |
| DSYVGDEAQS       | P60010     | ACT         | -15.5        |
| DVQEIFR          | Q07478     | SUB2        | 29.6         |
| DWNVDLIPK        | Q5SX87     | GDI2        | 70.5         |
| EAYPGDVFYLSHR    | P07251     | ATPA        | 46.4         |
| ECADLWPR         | J3KTJ3     | RPL23       | 28.7         |
| EDAANNYAR        | P09734     | TBA3        | -23.2        |
| EGIPPDQQR        | P0CG63     | UBI4P       | -15.8        |
| EHAALPR          | P19414     | ACON        | -22.6        |
| EIAQDFK          | P61830     | H3          | -4.0         |
| EIQTAVER         | P02293     | H2B1        | -17.1        |
| ELIIGDR          | K7EK77     | ATP5A1      | 11.6         |
| ELISNASDALDK     | P02829     | HSP82       | 23.5         |
| EMVELPLR         | P25694     | CDC48       | 48.0         |
| ESTLHLVLR        | M0R2S1     | UBA52       | 28.5         |
| EVDIGIPDATGR     | P25694     | CDC48       | 37.1         |
| FDDGAGGDNEVQR    | P33299     | PRS7        | -11.3        |
| FDLMYAK          | C9J2C0     | TUBA8       | 38.2         |
| FDNLYGCR         | P39954     | SAHH        | 9.6          |

|                   |        |          |       |
|-------------------|--------|----------|-------|
| FEELCADLFR        | P22202 | HSP74    | 73.5  |
| FELTGIPPAPR       | P16474 | GRP78    | 53.1  |
| FELSGIPPAPR       | P22202 | HSP74    | 52.5  |
| FPFAANSR          | E9PEX6 | DLD      | 18.8  |
| FQSLGVAFYR        | P32939 | YPT7     | 60.2  |
| FTQAGSEVSALLGR    | P00830 | ATPB     | 61.5  |
| FTVDLPK           | I3L492 | ETF1     | 37.9  |
| FVIGGPQGDAGLTGR   | P19358 | METK2    | 40.6  |
| GCEVVVSGK         | P05750 | RS3      | -15.5 |
| GEEILSGAQR        | P04802 | SYDC     | -1.8  |
| GILFVGSGVSGGEEGAR | P38720 | 6PGD1    | 51.2  |
| GILLYGPPGTGK      | P52917 | VPS4     | 45.4  |
| GIRPAINVGLSVSR    | K7ENP3 | ATP5A1   | 38.0  |
| GNHECASINR        | F8VYE8 | PPP1CC   | -23.6 |
| GVCTEAGMYALR      | Q01939 | PRS8     | 31.2  |
| GVLLYGPPGTGK      | Q01939 | PRS8     | 28.1  |
| GVLMYGPPGTGK      | P25694 | CDC48    | 28.2  |
| HFSVEGQLEFR       | Q86U12 | HSP90AA1 | 41.1  |
| HITIFSPEGR        | P21243 | PSA1     | 22.4  |
| HLQLAIR           | Q12692 | H2AZ     | 9.4   |
| HLTGEFEK          | P32836 | GSP2     | -13.7 |
| HVFGQAAK          | Q06440 | CORO     | -24.5 |
| ICDFGLAR          | P41808 | SMK1     | 28.0  |
| ICGDIHGQYYDLLR    | F5H037 | PPP1CA   | 50.3  |
| IETLDPALIRPGR     | P40327 | PRS4     | 43.4  |
| IGGIGTVPVGR       | P02994 | EF1A     | 21.9  |
| IGLFGGAGVGK       | P00830 | ATPB     | 43.3  |
| IGPLGLSPK         | P0CX54 | RL12B    | 29.5  |
| IHETNLK           | P19414 | ACON     | -25.5 |
| IINEPTAAAIAYGLDK  | E9PN89 | HSPA8    | 65.7  |
| IYGFYDECK         | P32598 | PP12     | 31.7  |
| KPLLESGTLGTK      | P22515 | UBA1     | 9.1   |
| LAEQAER           | P34730 | BMH2     | -25.1 |
| LGANSLLDLVVFGR    | H0Y8X1 | SDHA     | 134.0 |
| LIEDFLAR          | P36149 | BET3     | 56.9  |
| LILIESR           | P05756 | RS13     | 28.1  |
| LPLQDVYK          | P02994 | EF1A     | 29.2  |
| LQIWDTAGQER       | H0YDK7 | RAB30    | 36.3  |
| LVIVGDGACGK       | E9PQH6 | RHOC     | 10.8  |
| LVLVGDGGTGK       | P32836 | GSP2     | 12.0  |
| LYQVEYAFK         | P21243 | PSA1     | 46.3  |
| MLSCAGADR         | P41805 | RL10     | -15.5 |

|                  |        |        |       |
|------------------|--------|--------|-------|
| NILGGTVFR        | P21954 | IDHP   | 49.6  |
| NIVEAAAVR        | P39939 | RS26B  | 5.7   |
| NLLSVAYK         | I3L3T1 | YWHAE  | 34.3  |
| NLQYYDISAK       | F5H018 | RAN    | 25.8  |
| NMSVIAHVDHGK     | P13639 | EF2    | -5.4  |
| QAVDVSPLR        | M0QZN2 | RPS5   | 11.3  |
| QTVAVGVK         | P02994 | EF1A   | 9.9   |
| SAPSTGGVK        | P61830 | H3     | -27.6 |
| SGQGAFGNMCR      | H3BU31 | RPL4   | 0.8   |
| SNYNFEKPFLWLAR   | F5H018 | RAN    | 96.0  |
| STELLIR          | P61830 | H3     | 18.1  |
| STTTGHLIYK       | A6PW80 | EEF1A1 | -9.5  |
| SYELPDGQVITIGNER | P60010 | ACT    | 67.3  |
| TIAMDGTEGLVR     | P00830 | ATPB   | 32.8  |
| TIVMGASFR        | P15019 | TAL1   | 29.5  |
| TLSDYNIQK        | P0CG63 | UBI4P  | 4.4   |
| TTIFSPEGR        | P23638 | PSA3   | 15.2  |
| TTPSYVAFTDTER    | E9PPY6 | HSPA8  | 33.8  |
| TTVEYLIK         | Q00955 | ACAC   | 30.2  |
| VAVVAGYGDVGK     | P39954 | SAHH   | 15.3  |
| VCENIPIVLCGNK    | P32836 | GSP2   | 49.1  |
| VLPSIVNEVLK      | P50085 | PHB2   | 83.8  |
| VPAINVNDVTK      | P39954 | SAHH   | 17.7  |
| VSTEVDAR         | P53228 | TAL2   | -20.1 |
| VVPGYGHAVLR      | P00890 | CISY1  | 8.6   |
| WPFWLSPR         | P04801 | SYTC   | 98.4  |
| YAWVLDK          | P02994 | EF1A   | 41.6  |
| YDSTHGR          | P00358 | G3P2   | -57.1 |
| YFPTQALNFAFK     | P18238 | ADT3   | 95.4  |
| YLVLDEADR        | P06634 | DED1   | 27.7  |
| YPIEHGIVTNWDDMEK | P60010 | ACT    | 56.9  |
| YTQSNSVCYAK      | P54113 | PUR91  | -12.8 |

---

C - Carbamidomethylation, \* Human or Yeast Uniprot Entry; \*\* Most common gene name; \*\*\*Negative iRTs are a function of how the scale is defined, as described in (15)









|                          |           |           |           |           |           |           |           |           |           |           |           |           |
|--------------------------|-----------|-----------|-----------|-----------|-----------|-----------|-----------|-----------|-----------|-----------|-----------|-----------|
| LPLQDVYK                 |           |           |           |           |           |           |           |           |           |           |           |           |
| LVIVGDGAC[160]GK         |           |           |           |           |           |           |           |           |           |           |           |           |
| LYQVEYAFK                |           |           |           |           |           |           |           |           |           |           |           |           |
| MLSC[160]AGADR           |           |           |           |           |           |           |           |           |           |           |           |           |
| SNYNFEKPFLWLR            |           |           |           |           |           |           |           |           |           |           |           |           |
| VLPSIVNEVLK              |           |           |           |           |           |           |           |           |           |           |           |           |
| VPAINVNDSTVK             |           |           |           |           |           |           |           |           |           |           |           |           |
| VSTEVDAR                 |           |           |           |           |           |           |           |           |           |           |           |           |
| VVPGYGHAVLR              |           |           |           |           |           |           |           |           |           |           |           |           |
| AFEEAEK                  |           |           |           |           |           |           |           |           |           |           |           |           |
| AFLIEEQK                 |           |           |           |           |           |           |           |           |           |           |           |           |
| AILGSVER                 |           |           |           |           |           |           |           |           |           |           |           |           |
| APGFGDNR                 |           |           |           |           |           |           |           |           |           |           |           |           |
| ATIGADFLTK               |           |           |           |           |           |           |           |           |           |           |           |           |
| C[160]ATITPDEAR          |           |           |           |           |           |           |           |           |           |           |           |           |
| DSTLIMQLLR               |           |           |           |           |           |           |           |           |           |           |           |           |
| EAYPGDVFYLHSR            |           |           |           |           |           |           |           |           |           |           |           |           |
| EDAANNYAR                |           |           |           |           |           |           |           |           |           |           |           |           |
| EHAALPR                  |           |           |           |           |           |           |           |           |           |           |           |           |
| EIAQDFK                  |           |           |           |           |           |           |           |           |           |           |           |           |
| FDDGAGGDNEVQR            |           |           |           |           |           |           |           |           |           |           |           |           |
| FQSLGVAFYR               |           |           |           |           |           |           |           |           |           |           |           |           |
| GC[160]EVVVSQK           |           |           |           |           |           |           |           |           |           |           |           |           |
| GEEILSGAQR               |           |           |           |           |           |           |           |           |           |           |           |           |
| GVC[160]TEAGMYALR        |           |           |           |           |           |           |           |           |           |           |           |           |
| GVLMYGPPGTGK             |           |           |           |           |           |           |           |           |           |           |           |           |
| KPLLESGTLGTK             |           |           |           |           |           |           |           |           |           |           |           |           |
| LIEDFLAR                 |           |           |           |           |           |           |           |           |           |           |           |           |
| LQIWDTAGQER              |           |           |           |           |           |           |           |           |           |           |           |           |
| NLLSVAYK                 |           |           |           |           |           |           |           |           |           |           |           |           |
| NLQYYDISAK               |           |           |           |           |           |           |           |           |           |           |           |           |
| QAVDVSPLR                |           |           |           |           |           |           |           |           |           |           |           |           |
| TIVMGASFR                |           |           |           |           |           |           |           |           |           |           |           |           |
| TLSDYNIQK                |           |           |           |           |           |           |           |           |           |           |           |           |
| TTIFSPEGR                |           |           |           |           |           |           |           |           |           |           |           |           |
| VAVVAGYGDVQK             |           |           |           |           |           |           |           |           |           |           |           |           |
| VC[160]ENIPIVLC[160]GNK  |           |           |           |           |           |           |           |           |           |           |           |           |
| YPIEHGIVTNWDDMEK         |           |           |           |           |           |           |           |           |           |           |           |           |
| YTQSNSVC[160]YAK         |           |           |           |           |           |           |           |           |           |           |           |           |
| <b>TotalPeptidesUsed</b> | <b>18</b> | <b>20</b> | <b>22</b> | <b>31</b> | <b>26</b> | <b>19</b> | <b>24</b> | <b>25</b> | <b>21</b> | <b>24</b> | <b>22</b> | <b>20</b> |

**Supplementary Table 4: Software and Analytical Scripts for using CiRT peptides in openSWATH workflow**

| Task                                                | Software or Script             | Hosting Program                                                  | Standard Workflow                                                                                                                                                                                                                                                                       | CiRT adjustment                                                                                                                                  |
|-----------------------------------------------------|--------------------------------|------------------------------------------------------------------|-----------------------------------------------------------------------------------------------------------------------------------------------------------------------------------------------------------------------------------------------------------------------------------------|--------------------------------------------------------------------------------------------------------------------------------------------------|
| <b>Peptide Assay Library Assembly and Alignment</b> |                                |                                                                  |                                                                                                                                                                                                                                                                                         |                                                                                                                                                  |
| Initial peptide assay library build                 | SpectraST - Import Library     | Trans Proteomic Pipeline (TPP)                                   | spectrast -c_BIN! -cf'Protein!-DECOY' -cP[Minimum probability to include] -cl[fragmentation method_instrument, e.g. CID_TOF] -cN[Output_name] [input_interact.pep.xml]                                                                                                                  | None                                                                                                                                             |
| Library RT alignment to iRT space                   | spectrast2spectrast_iRT.py     | Python, code available from code.google.com/p/msproteo micstools | spectrast2spectrast.py -r -i inputfile.splib -o outputfile_iRT.splib                                                                                                                                                                                                                    | add the option -k Peptide1:iRT, peptide2:iRT, ... peptide[Last]:iRT to stipulate the use of CiRT internal peptides* rather than the default iRTs |
| Library Consolidation                               | SpectraST                      | TPP                                                              | spectrast -cAC -c_BIN! -cf'Protein!-iRT' -cNFractionsLib_14Oct13_iRT.splib_con FractionsLib_14Oct13_iRT.splib                                                                                                                                                                           | none                                                                                                                                             |
| Library conversion to .tsv                          | spectrast2tsv.py               | Python, code available from code.google.com/p/msproteo micstools | spectrast2tsv.py -l [ms/ms mass range] -s [ms/ms ions to include] -x[charge states] -o [min transitions] -n [max transitions] -p 0.05 -d -e -g [modifications allowed] -w [swath paramter file].txt -k [specify output format, i.e., openswath] -a [output name].tsv [input file].splib | none                                                                                                                                             |
| Library conversion to .TraML                        | ConvertTSVToTraML.py           | Python, code available from code.google.com/p/msproteo micstools | ConvertTSVToTraML -in [input_filename].tsv -out [output_filename].TraML                                                                                                                                                                                                                 | none                                                                                                                                             |
| Append decoy transitions to peptide assay library   | OpenSwathDecoyGenerator        | OpenMS                                                           | OpenSwathDecoyGenerator -in [input_File].TraML -out [output_file]_decoy.TraML -min_transitions 5 -max_transitions 5 -method shuffle -append -exclude_similar                                                                                                                            | none                                                                                                                                             |
| <b>OpenSWATH Data Analysis</b>                      |                                |                                                                  |                                                                                                                                                                                                                                                                                         |                                                                                                                                                  |
| Extract iRT chromatograms                           | OpenSwathChromatogramExtractor | openMS                                                           | See paper by Rost et al, Reference #15                                                                                                                                                                                                                                                  | -tr CiRT_SW.TraML* (rather than standard SiRT .TraML)                                                                                            |
| Align RT-to-iRT for SiRT or CiRT reference peptides | OpenSWATHRTNormalizer          | openMS                                                           | See paper by Rost et al, Reference #15                                                                                                                                                                                                                                                  | -best_peptides                                                                                                                                   |
| Extract and score full dataset                      | OpenSwathAnalyzer              | openMS                                                           | See paper by Rost et al, Reference #15                                                                                                                                                                                                                                                  | none                                                                                                                                             |

\*Available as supplemental downloads to this manuscript
